# Supplementary material for: Quantitative determination of trace level (ng g−1) contents of rhodium and palladium in copper-rich minerals using LA-ICP-MS
Source: Royal Society of Chemistry journal article supplement (doi:10.1039/c9ja00285e), 2020-01-01
Supplement: c9ja00285e1.pdf [file c9ja00285e1.pdf]

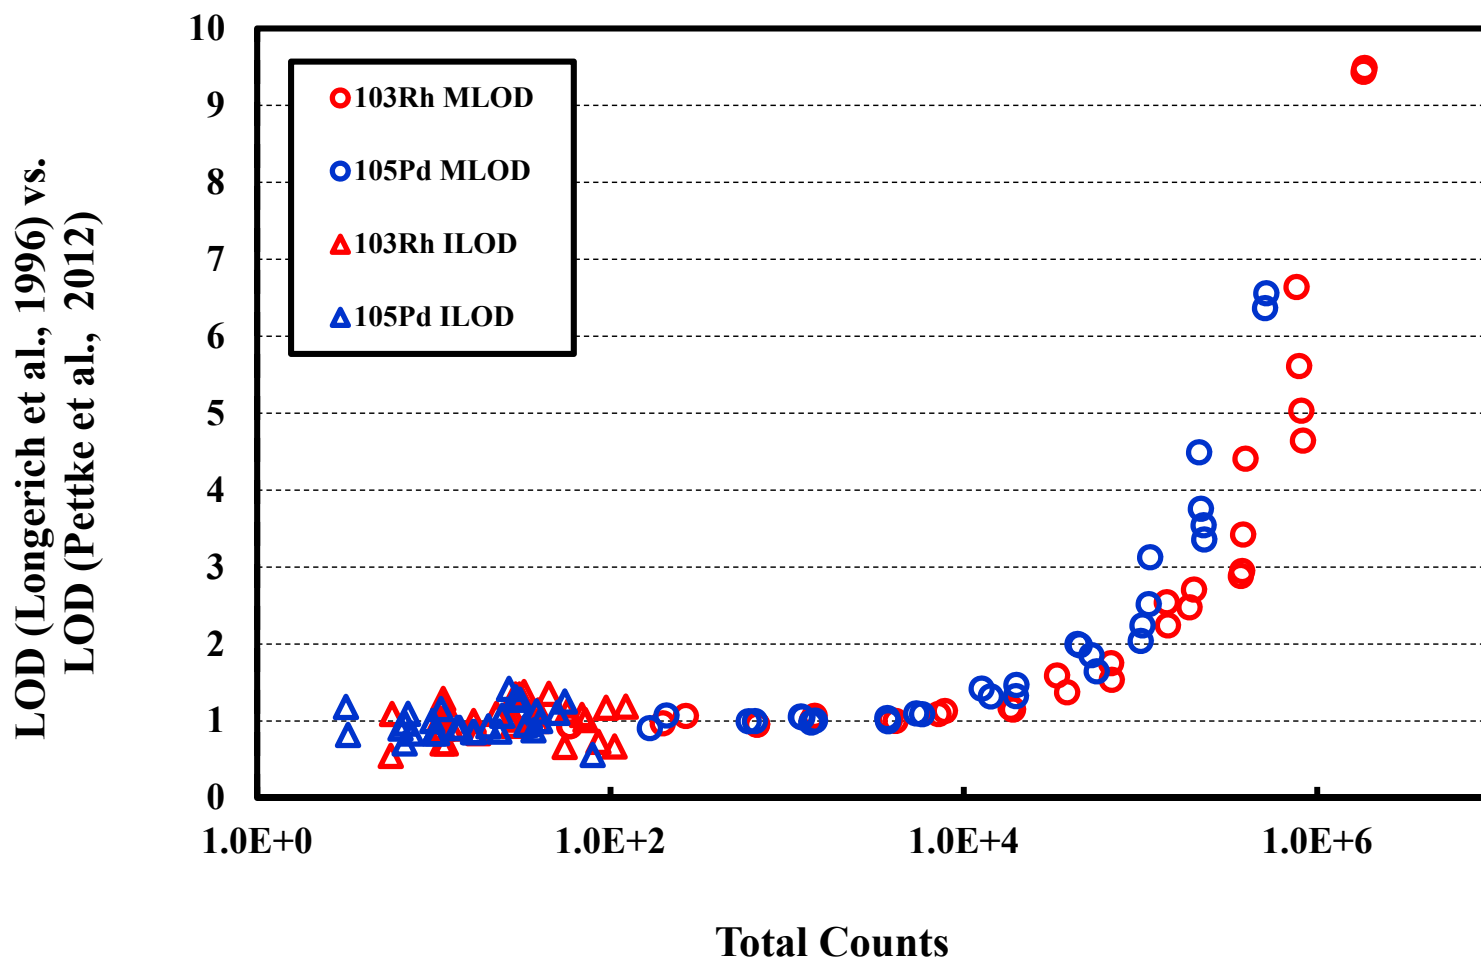

1

2 Supplementary Fig. 1† The instrument and method limits of detection (ILOD and MLOD) for <sup>103</sup>Rh and <sup>105</sup>Pd determined using the equations  
3 of Longerich et al. (1996)<sup>62</sup> and Pettke et al. (2012)<sup>64</sup> as a function of the total measured counts for Agilent 7700x LA-ICP-MS analysis of  
4 chalcopyrite and bornite.

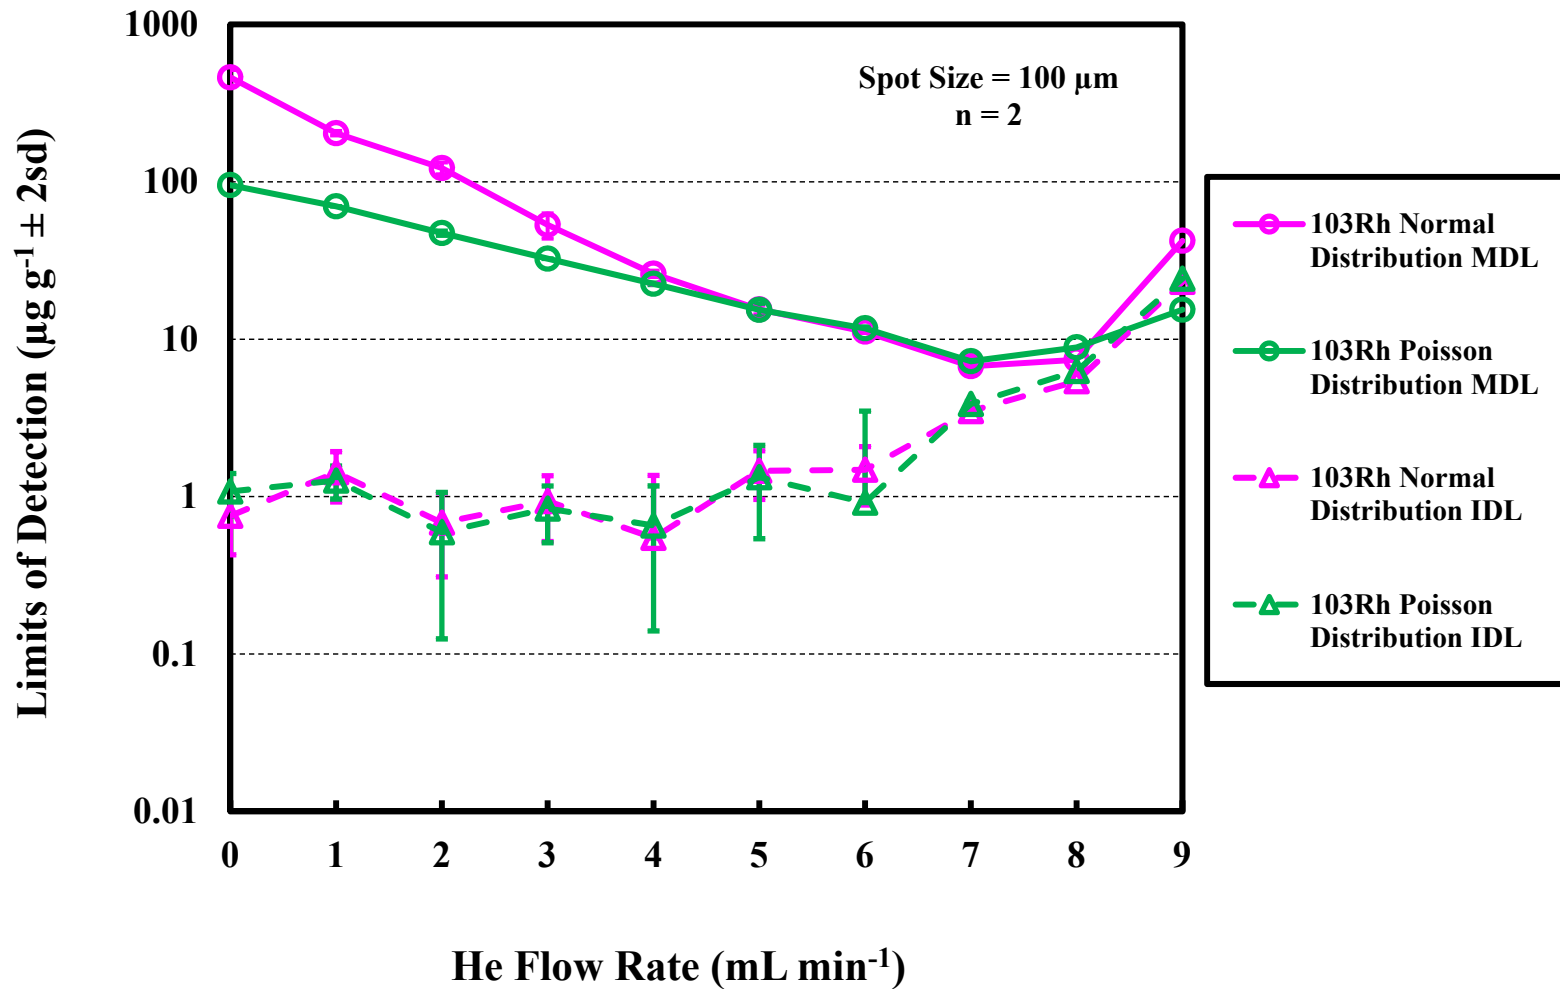

5

6 Supplementary Fig. 2-1† Method and instrument limits of detection (MLOD and ILOD) for <sup>103</sup>Rh determined using the equations of  
 7 Longerich et al. (1996)<sup>62</sup> (normal distribution) and Pettke et al. (2012)<sup>64</sup> (Poisson distribution) for Agilent 7700x LA-ICP-MS analysis of  
 8 chalcopyrite CRG-1902 (34.52% Cu).

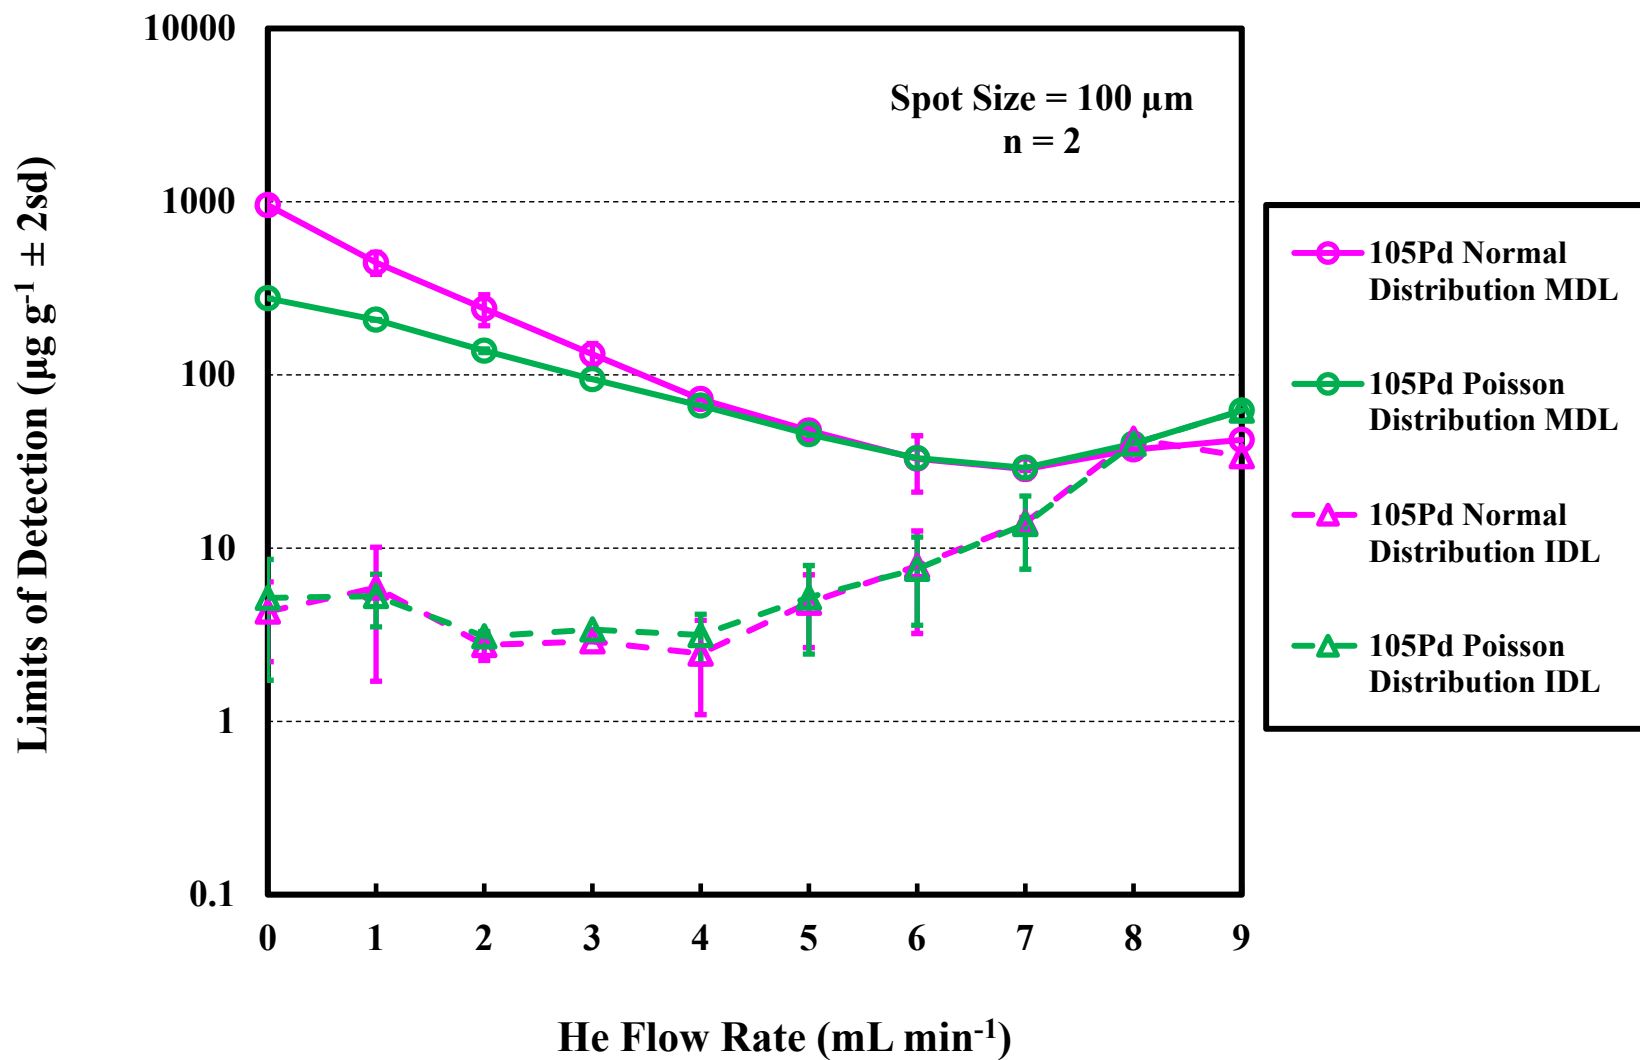

9

10 Supplementary Fig. 2-2† Method and instrument limits of detection (MLOD and ILOD) for <sup>105</sup>Pd determined using the equations of  
 11 Longerich et al. (1996)<sup>62</sup> (normal distribution) and Pettke et al. (2012)<sup>64</sup> (Poisson distribution) for Agilent 7700x LA-ICP-MS analysis of  
 12 chalcopyrite CRG-1902 (34.52% Cu).

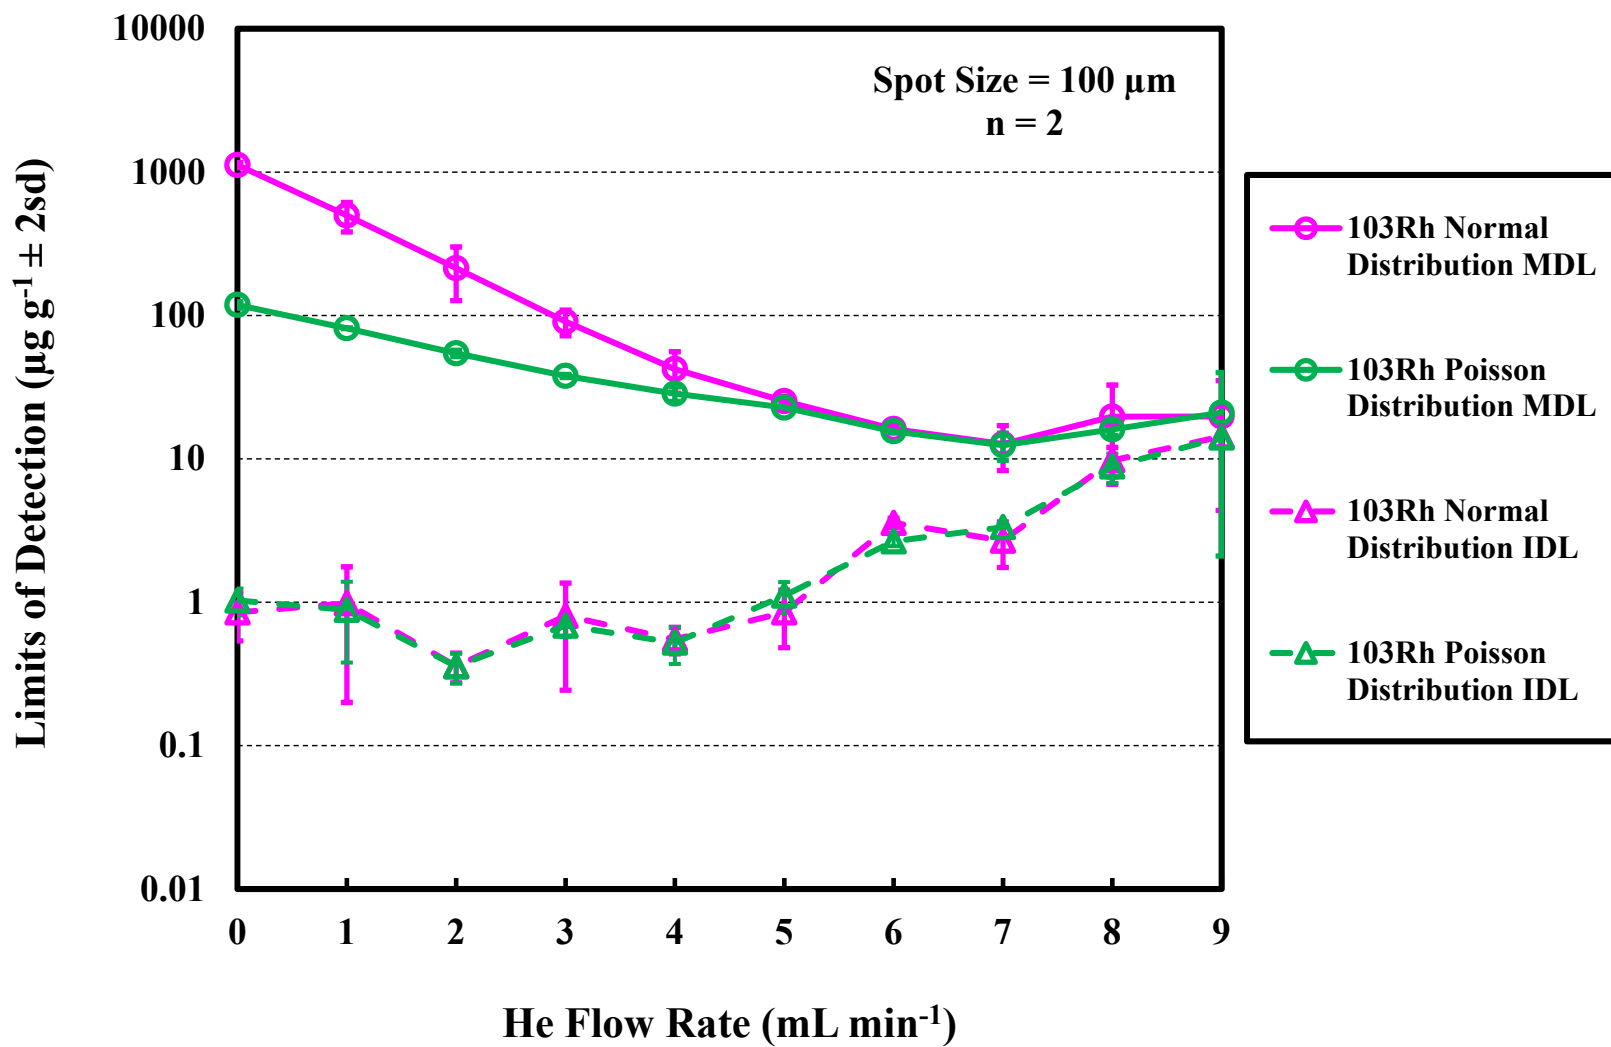

13

14 Supplementary Fig. 3-1† Method and instrument limits of detection (MLOD and ILOD) for <sup>103</sup>Rh determined using the equations of  
 15 Longerich et al. (1996)<sup>62</sup> (normal distribution) and Pettke et al. (2012)<sup>64</sup> (Poisson distribution) for Agilent 7700x LA-ICP-MS analysis of  
 16 bornite OSP9 (62.19% Cu).

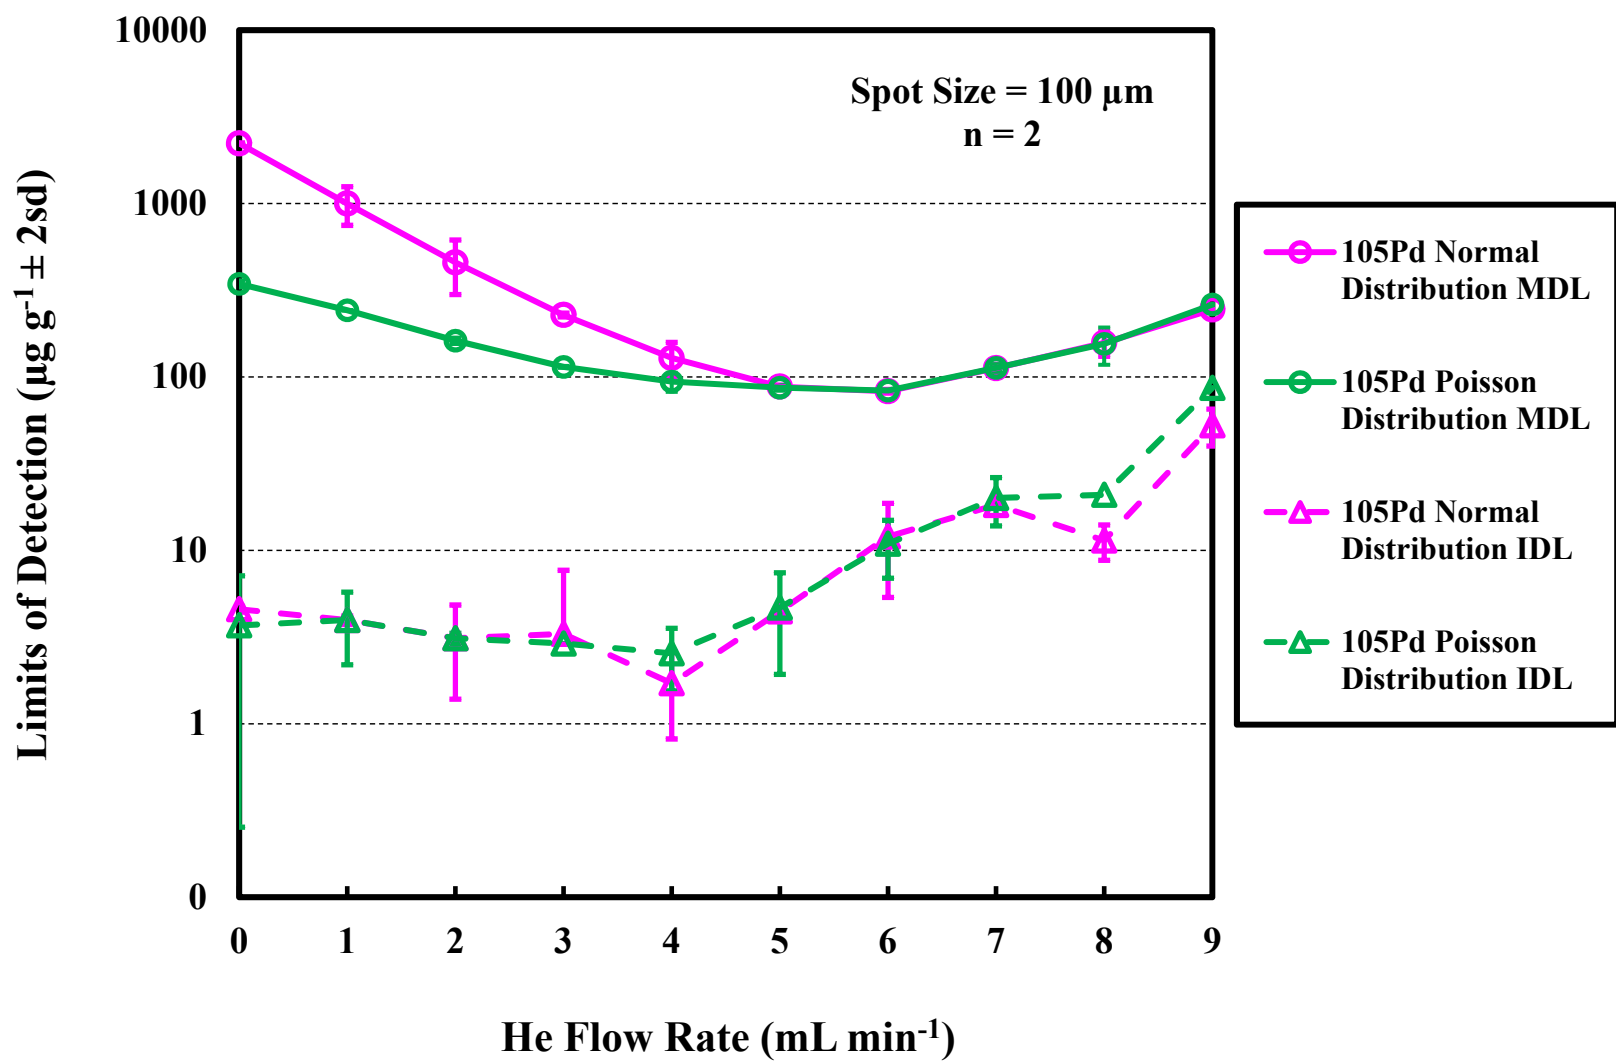

17

18 Supplementary Fig. 3-2† Method and instrument limits of detection (MLOD and ILOD) for <sup>105</sup>Pd determined using the equations of  
 19 Longerich et al. (1996)<sup>62</sup> (normal distribution) and Pettke et al. (2012)<sup>64</sup> (Poisson distribution) for Agilent 7700x LA-ICP-MS analysis of  
 20 bornite OSP9 (62.19% Cu).

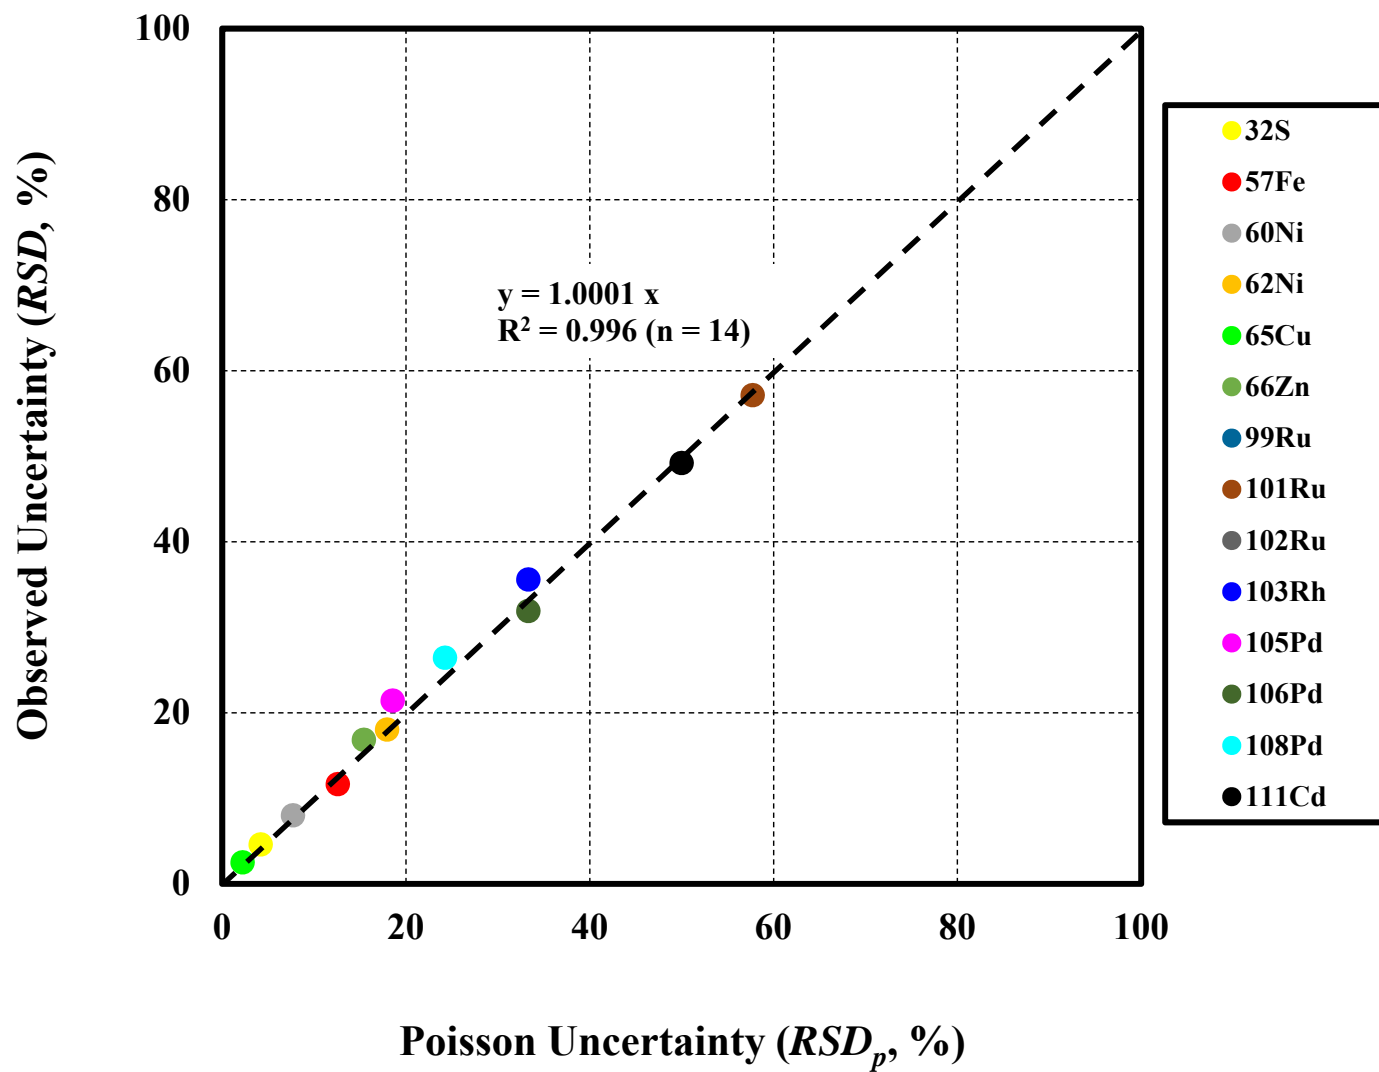

21

22 Supplementary Fig. 4-1† Observed uncertainty versus Poisson uncertainty for gas blank signals for 8900x LA-ICP-MS/MS PGE analysis

23 of Cu-rich mineral bornite OSP9 (AU21A17 experiment).

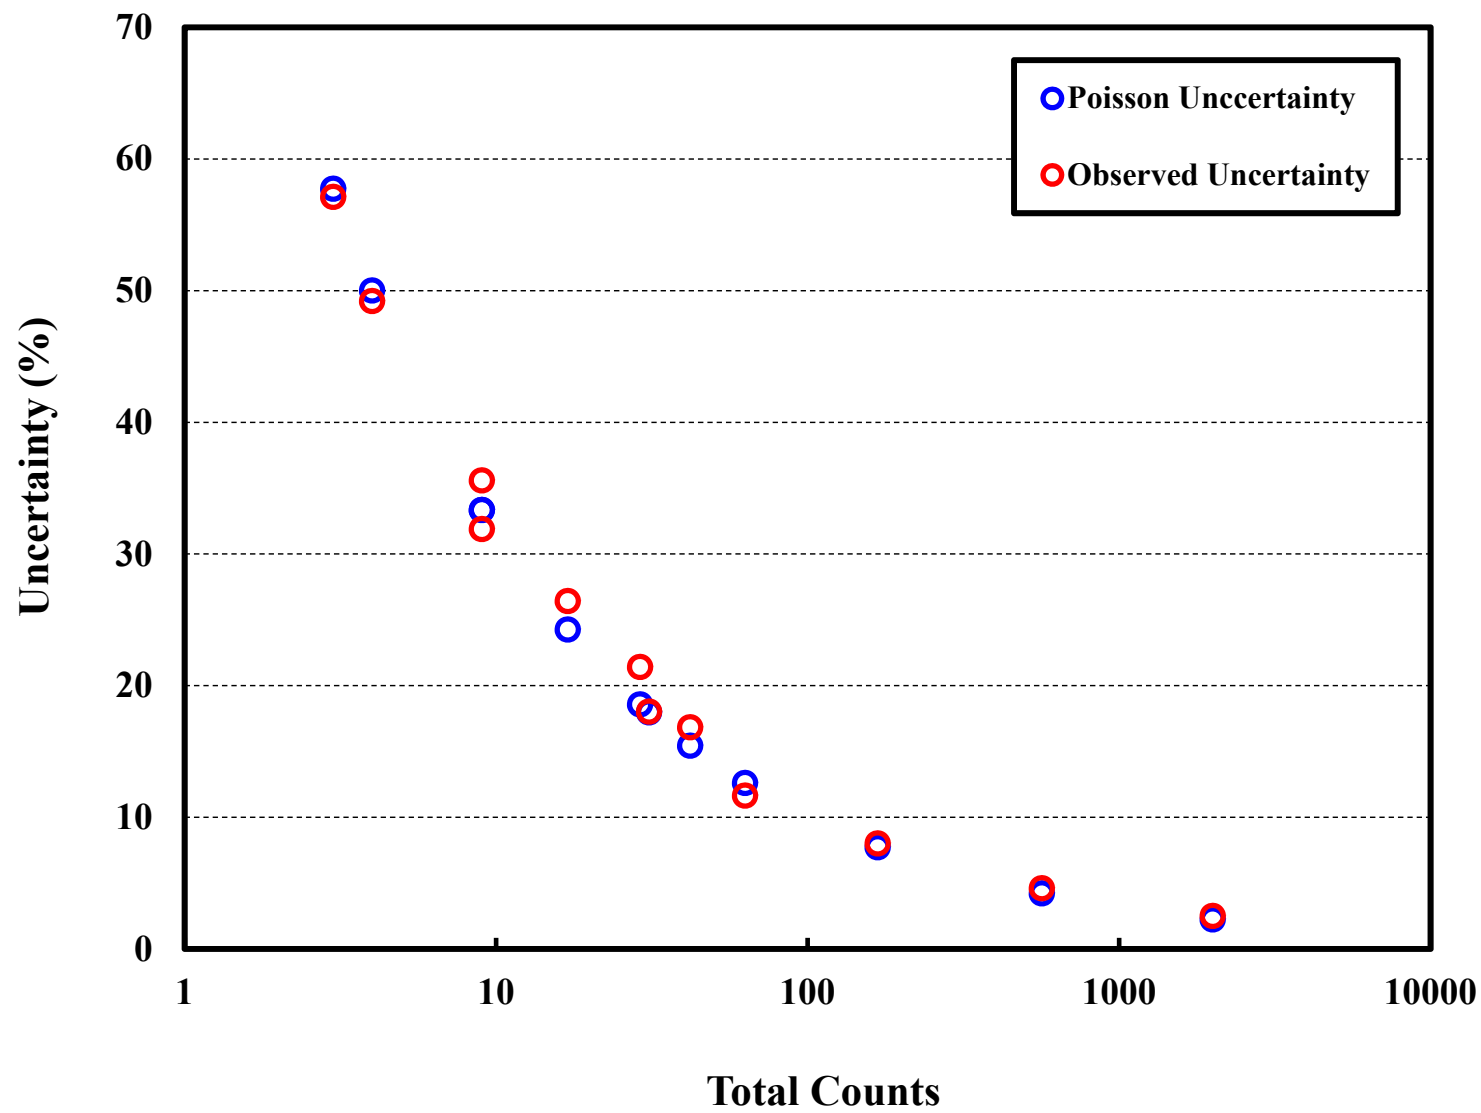

24

25 Supplementary Fig. 4-2† Poisson and observed measurement uncertainties versus total counts for the gas blank signals in 8900x LA-ICP-

26 MS/MS PGE analysis of Cu-rich mineral bornite (AU21A17 experiment).

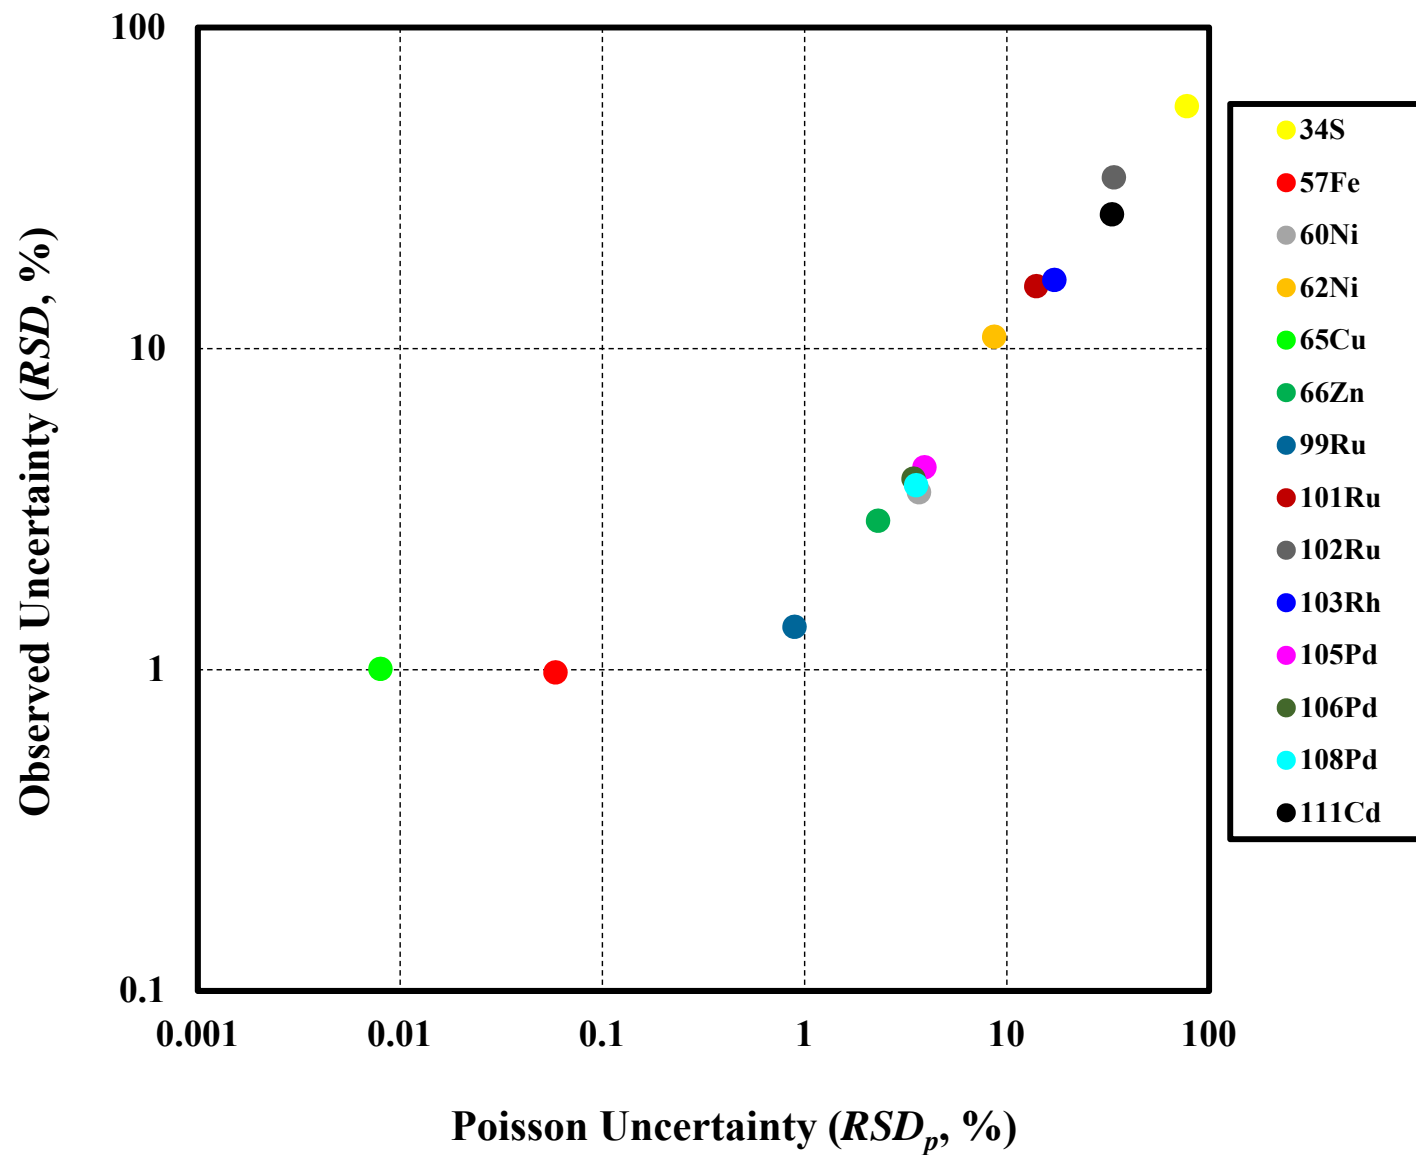

27

28 Supplementary Fig. 5† Observed uncertainty versus Poisson uncertainty of gas blank corrected sample signal in 8900x LA-ICP-MS/MS

29 PGE analysis of Cu-rich mineral bornite OSP9 (AU21A17 experiment).



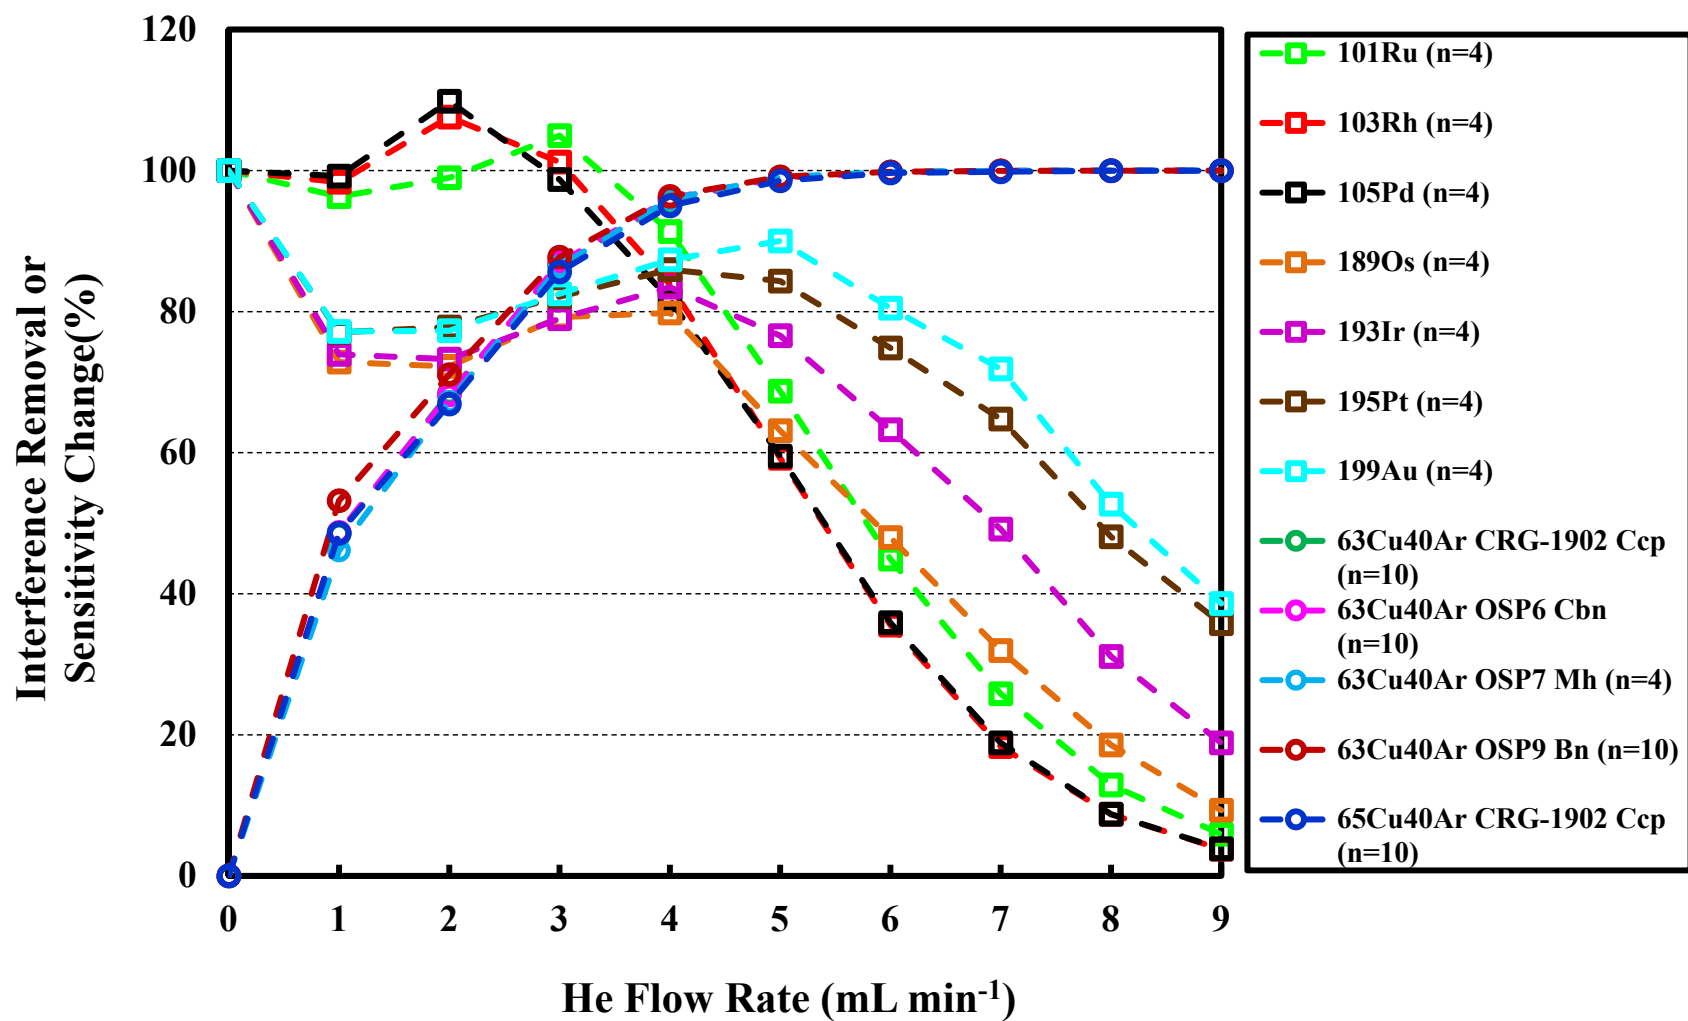

30

31 Supplementary Fig. 6-1† <sup>63</sup>Cu<sup>40</sup>Ar<sup>+</sup> and <sup>65</sup>Cu<sup>40</sup>Ar<sup>+</sup> interference removal and sensitivity change of <sup>103</sup>Rh<sup>+</sup> and <sup>105</sup>Pd<sup>+</sup>, as well as other PGE,  
 32 with change of He collision gas flow rate using 7700x LA-ICP-MS.

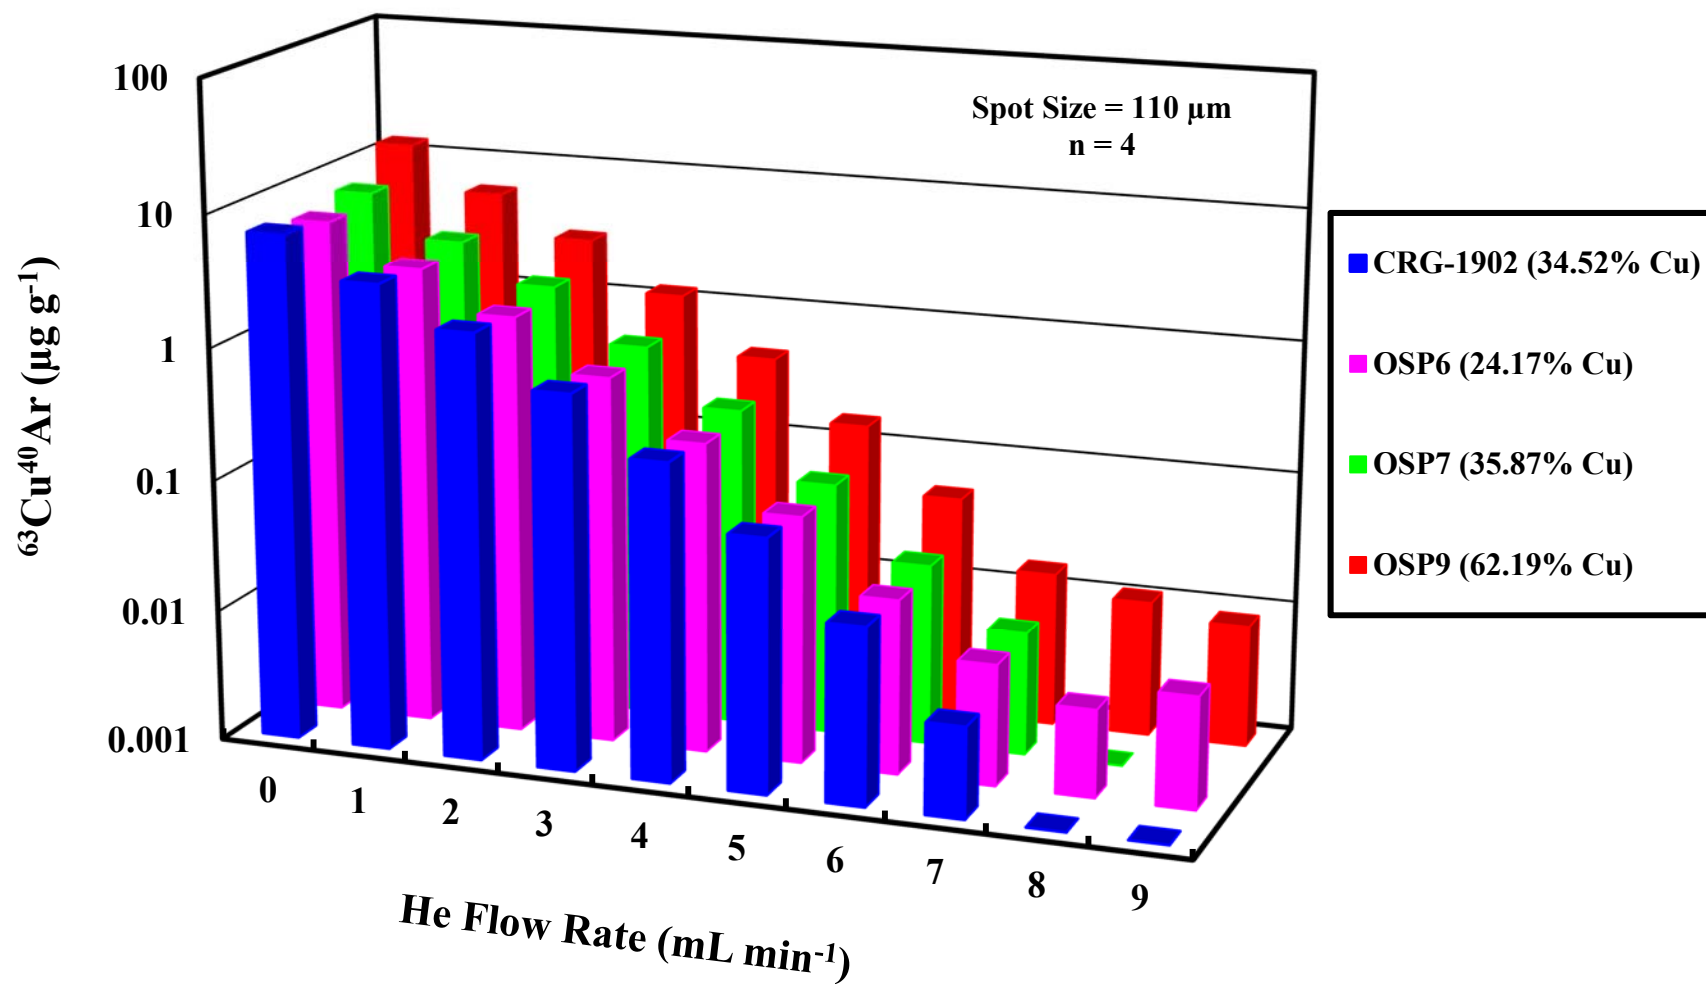

33

34 Supplementary Fig. 6-2†  $^{63}\text{Cu}^{40}\text{Ar}^+$  contribution on  $^{103}\text{Rh}^+$  in 7700x LA-ICP-MS analysis of Cu-rich materials with He collision gas flow

35 rates of 0 to 9 mL min<sup>-1</sup>.

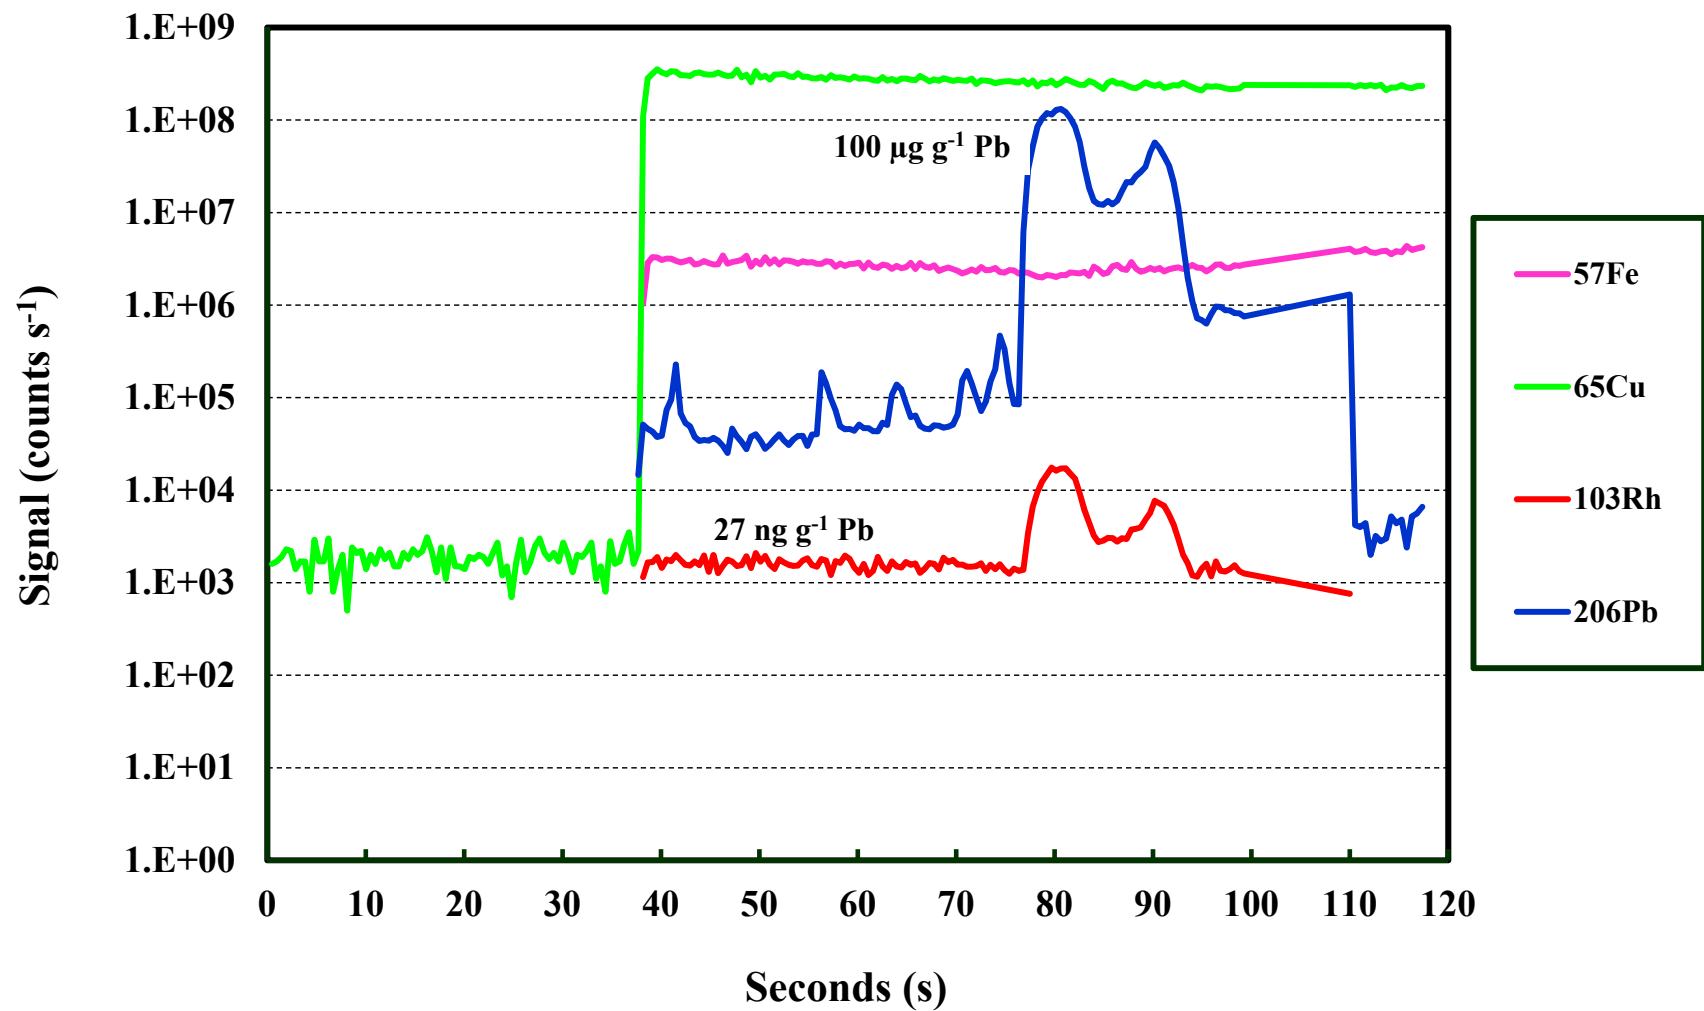

36

37 Supplementary Fig. 7-1† Time resolved signals for analysis of bornite CMNMC 42116 (analysis JN09F07) containing  $27 \text{ ng g}^{-1}$  to  $100 \mu\text{g}$

38  $\text{g}^{-1}$  Pb by 7700x LA-ICP-MS.

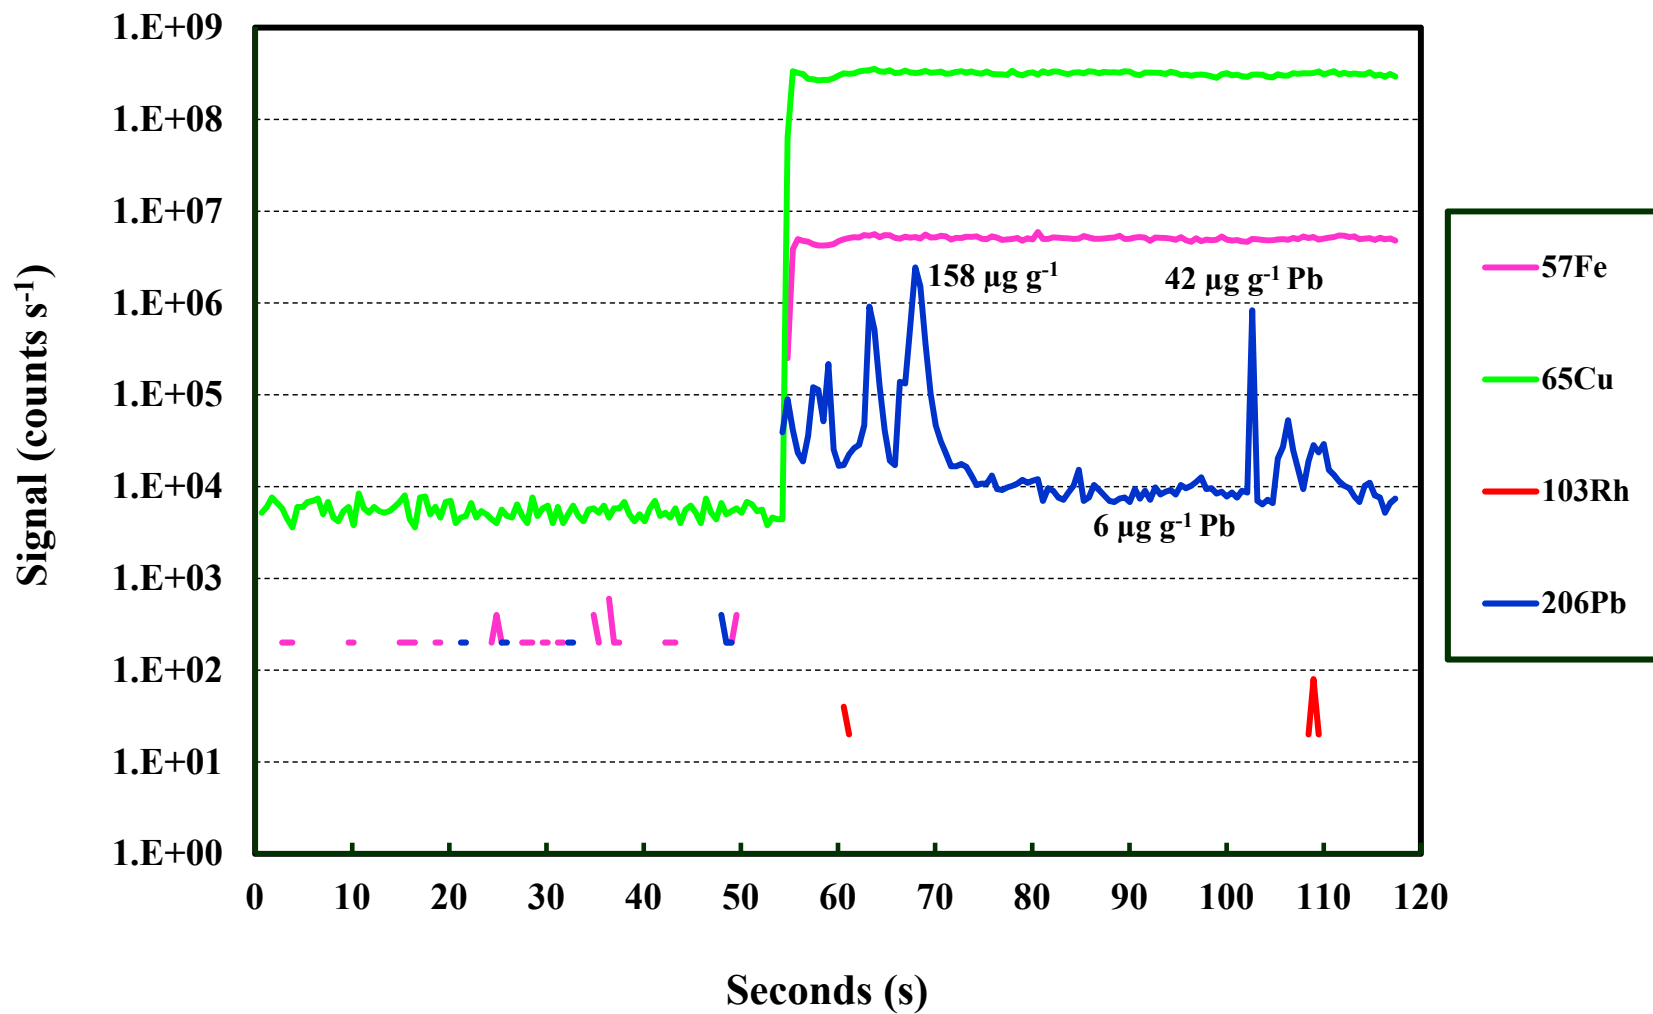

39

40 Supplementary Fig. 7-2† Time resolved signals for analysis of bornite CMNMC 42116 (analysis AU22D15) containing 6 to 158 μg g<sup>-1</sup> Pb  
 41 by 8900x LA-ICP-MS/MS.

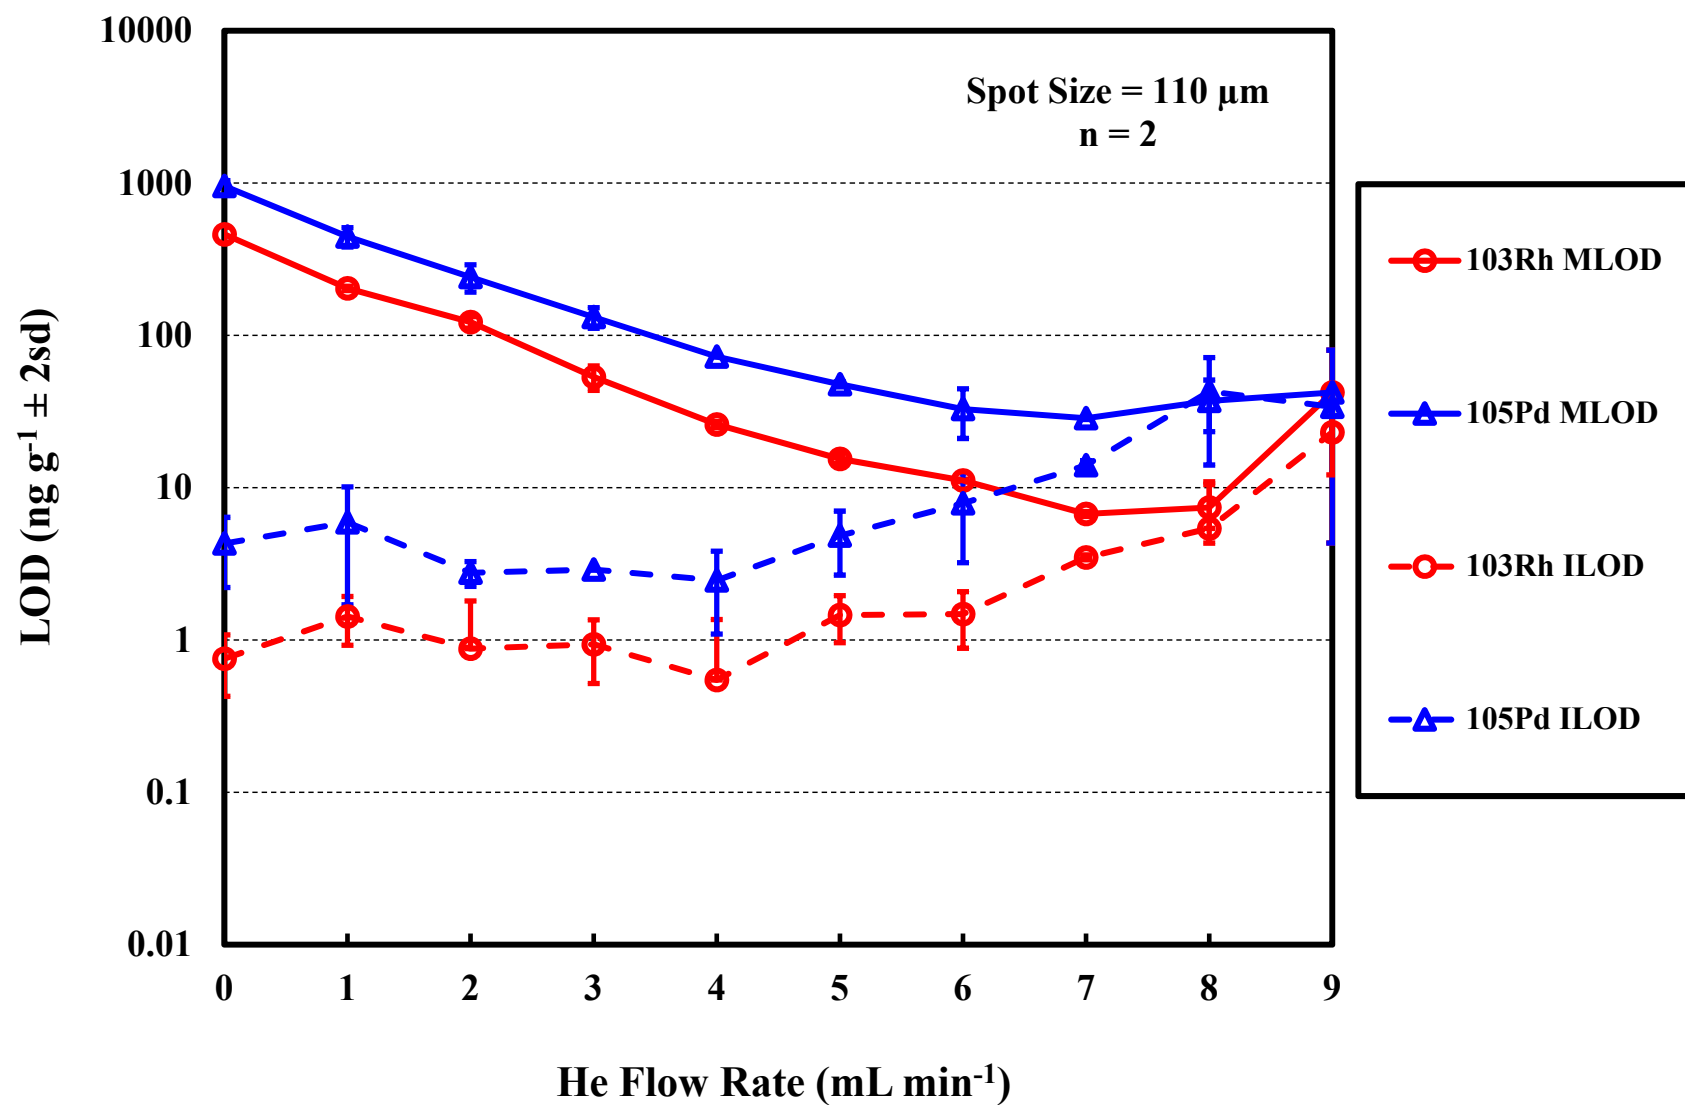

42

43 Supplementary Fig. 8-1† Method and instrument limits of detection (MLOD and ILOD) for <sup>103</sup>Rh and <sup>105</sup>Pd for Agilent 7700x LA-ICP-MS  
 44 analysis of chalcopyrite CRG-1902 (34.52% Cu).

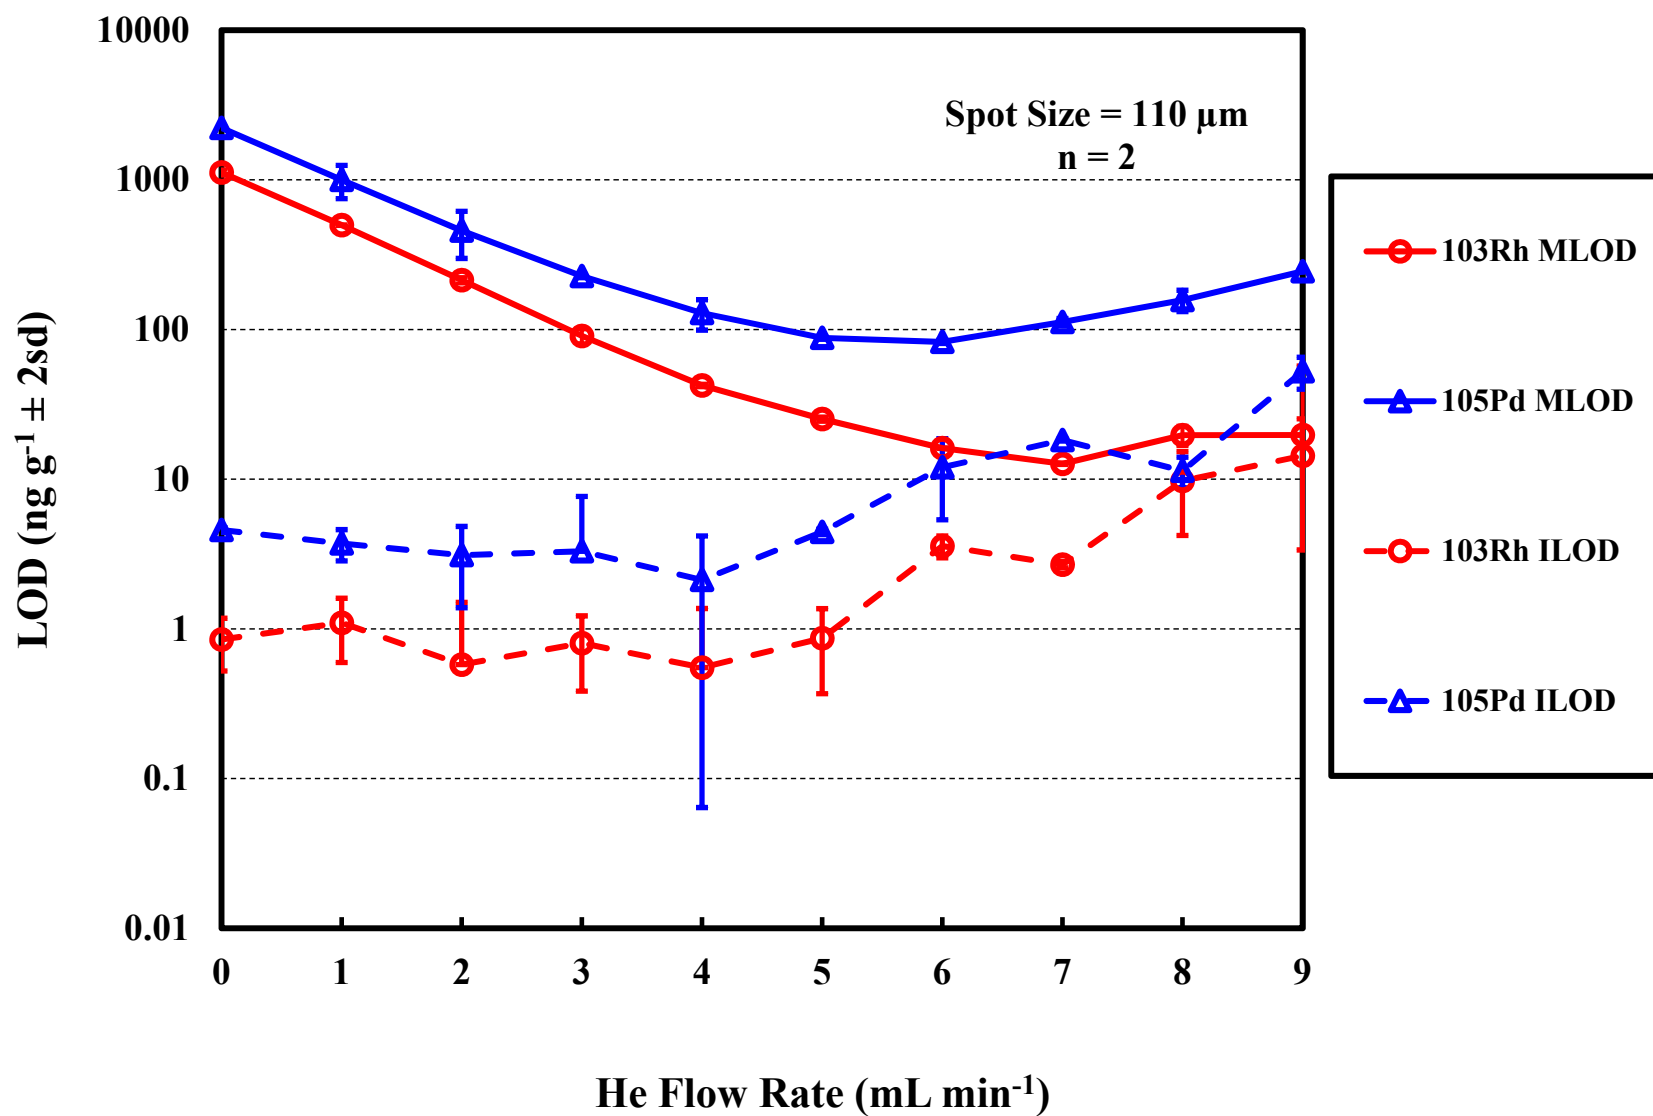

45

46 Supplementary Fig. 8-2† Method and instrument limits of detection (MLOD and ILOD) for  $^{103}\text{Rh}$  and  $^{105}\text{Pd}$  for Agilent 7700x LA-ICP-

47 MS analysis of bornite OSP9 (62.19%).

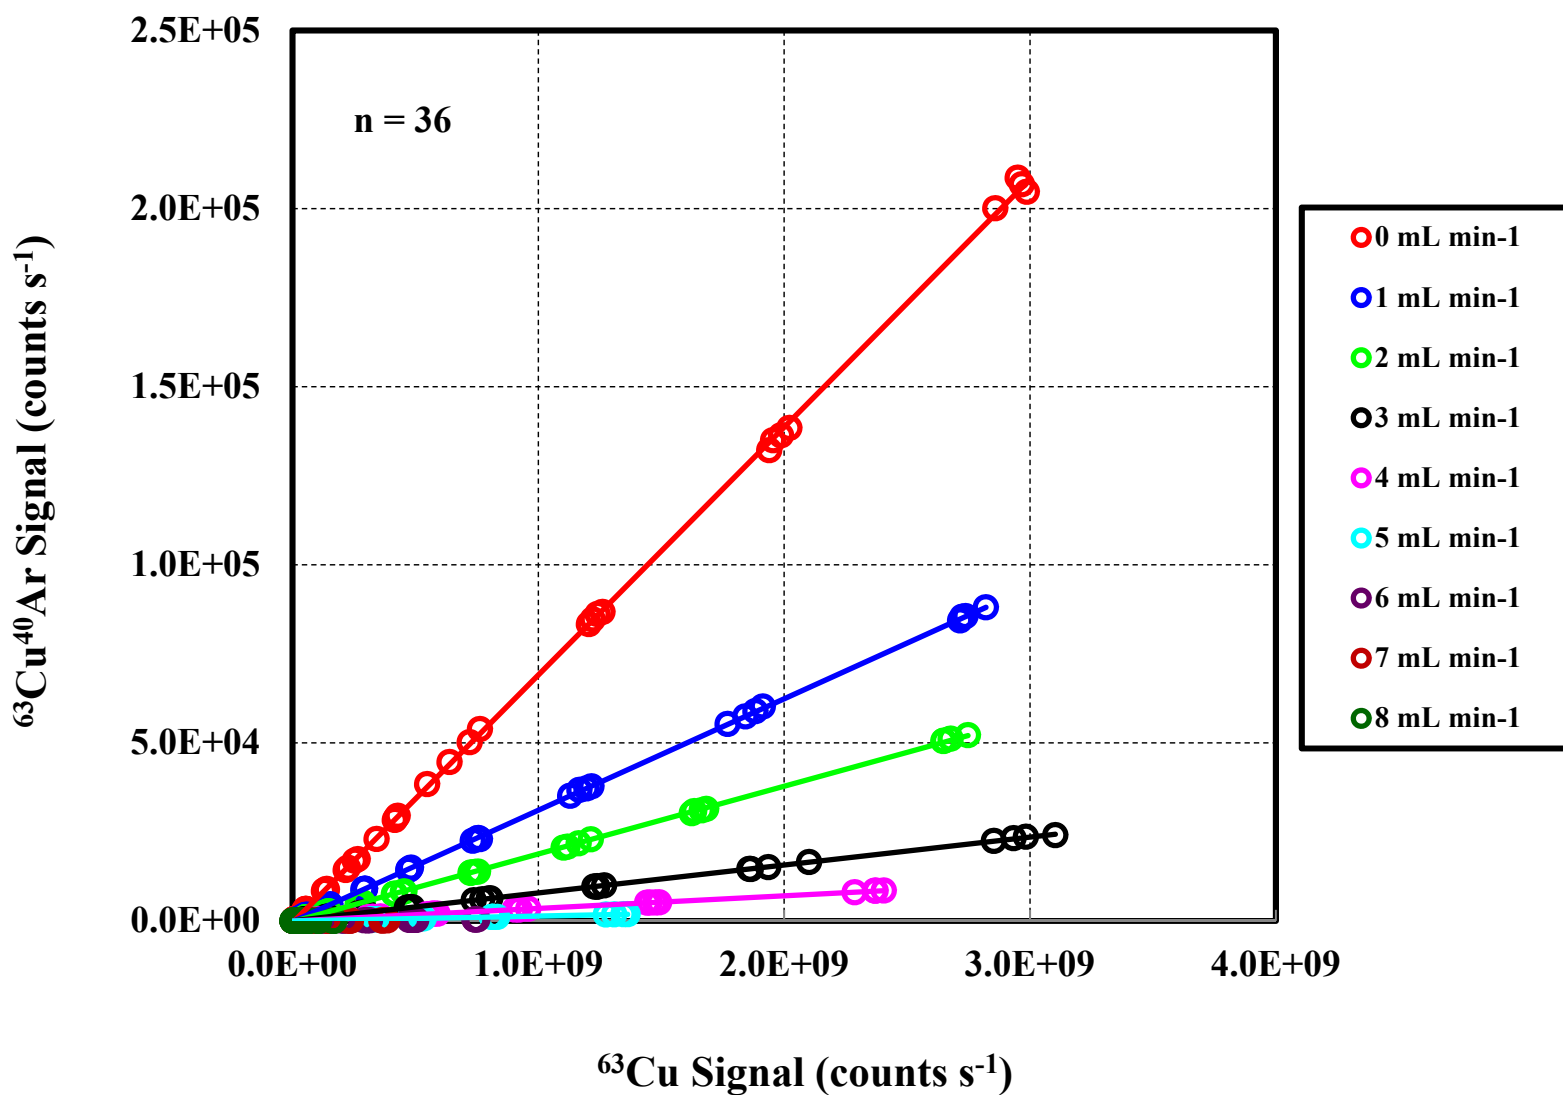

48

49 Supplementary Fig. 9† Signals (counts s $^{-1}$ ) of  $^{63}\text{Cu}^{40}\text{Ar}^+$  vs.  $^{63}\text{Cu}^+$  in 7700x LA-ICP-MS analyses of chalcopyrite CRG-1902 (34.52% Cu)

50 at He collision gas flow rate of 0 to 8 mL min $^{-1}$ .

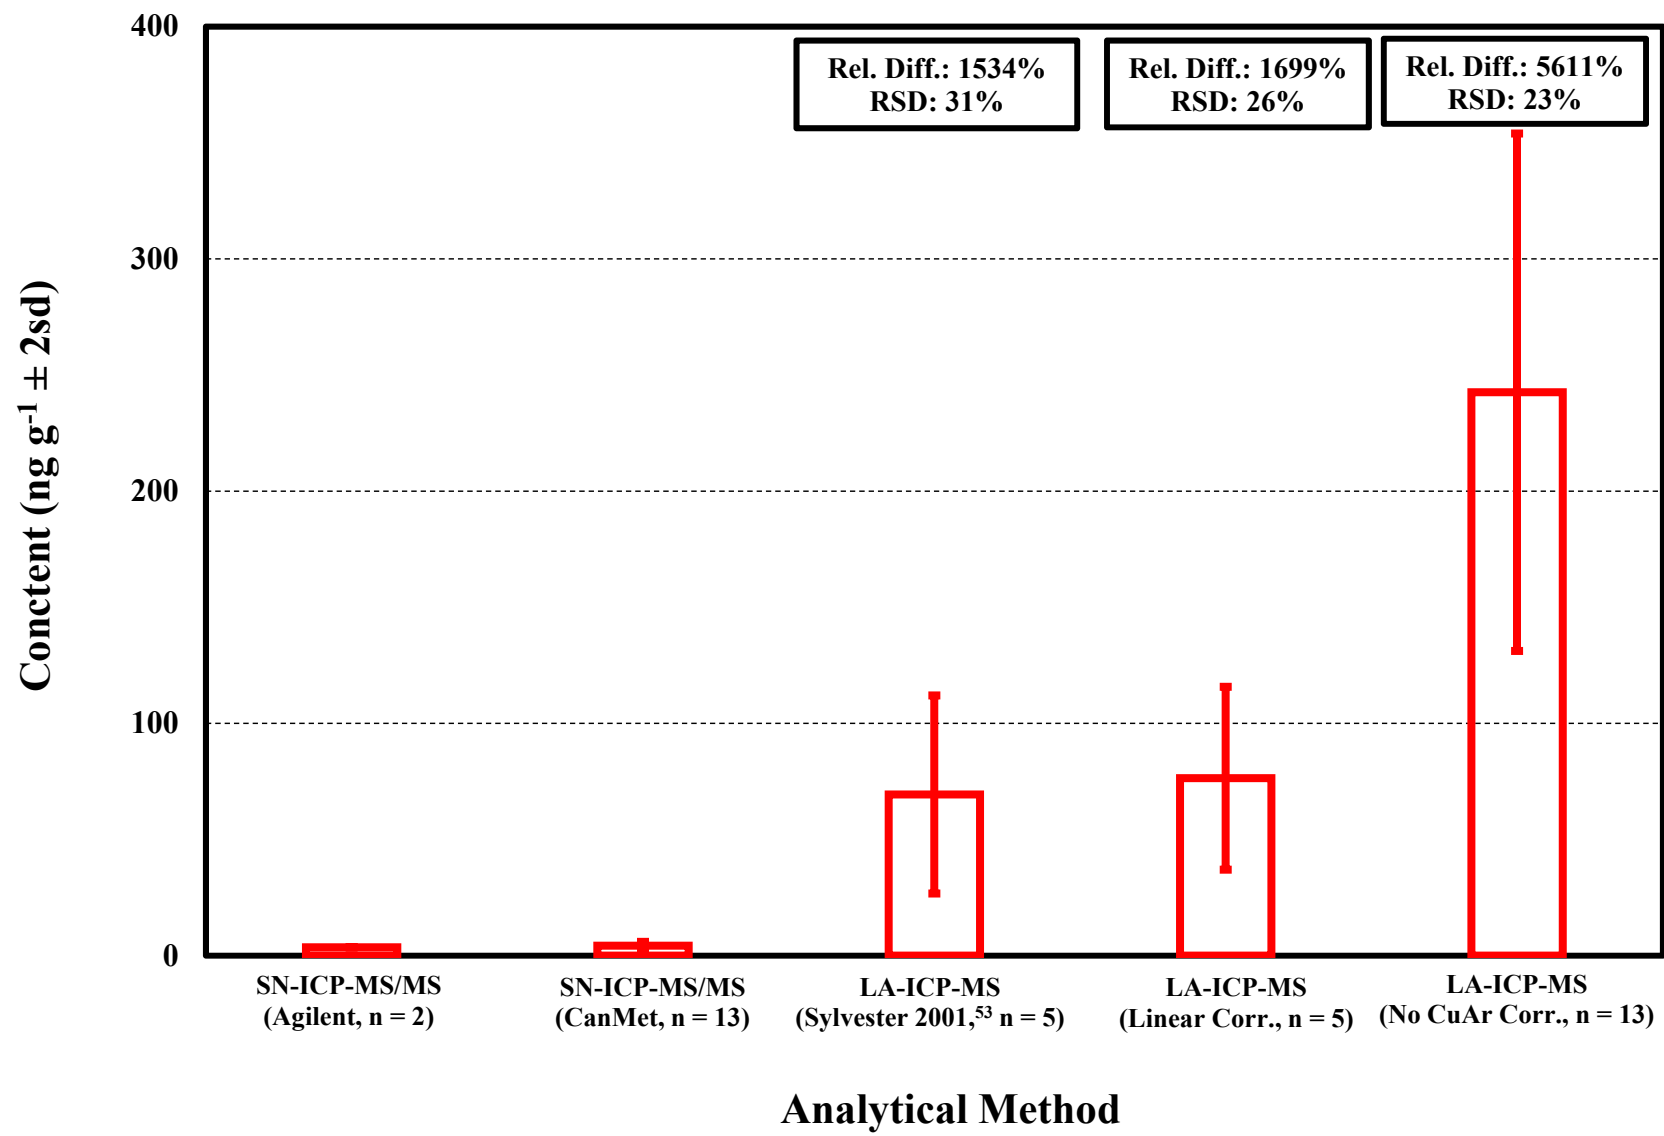

51

52 Supplementary Fig. 10-1† Rh content determination with and without using the Sylvester (2001)<sup>53</sup> and linear CuAr interference correction  
 53 procedures for 7700x LA-ICP-MS PGE analysis of bornite OSP9 (62.19% Cu).



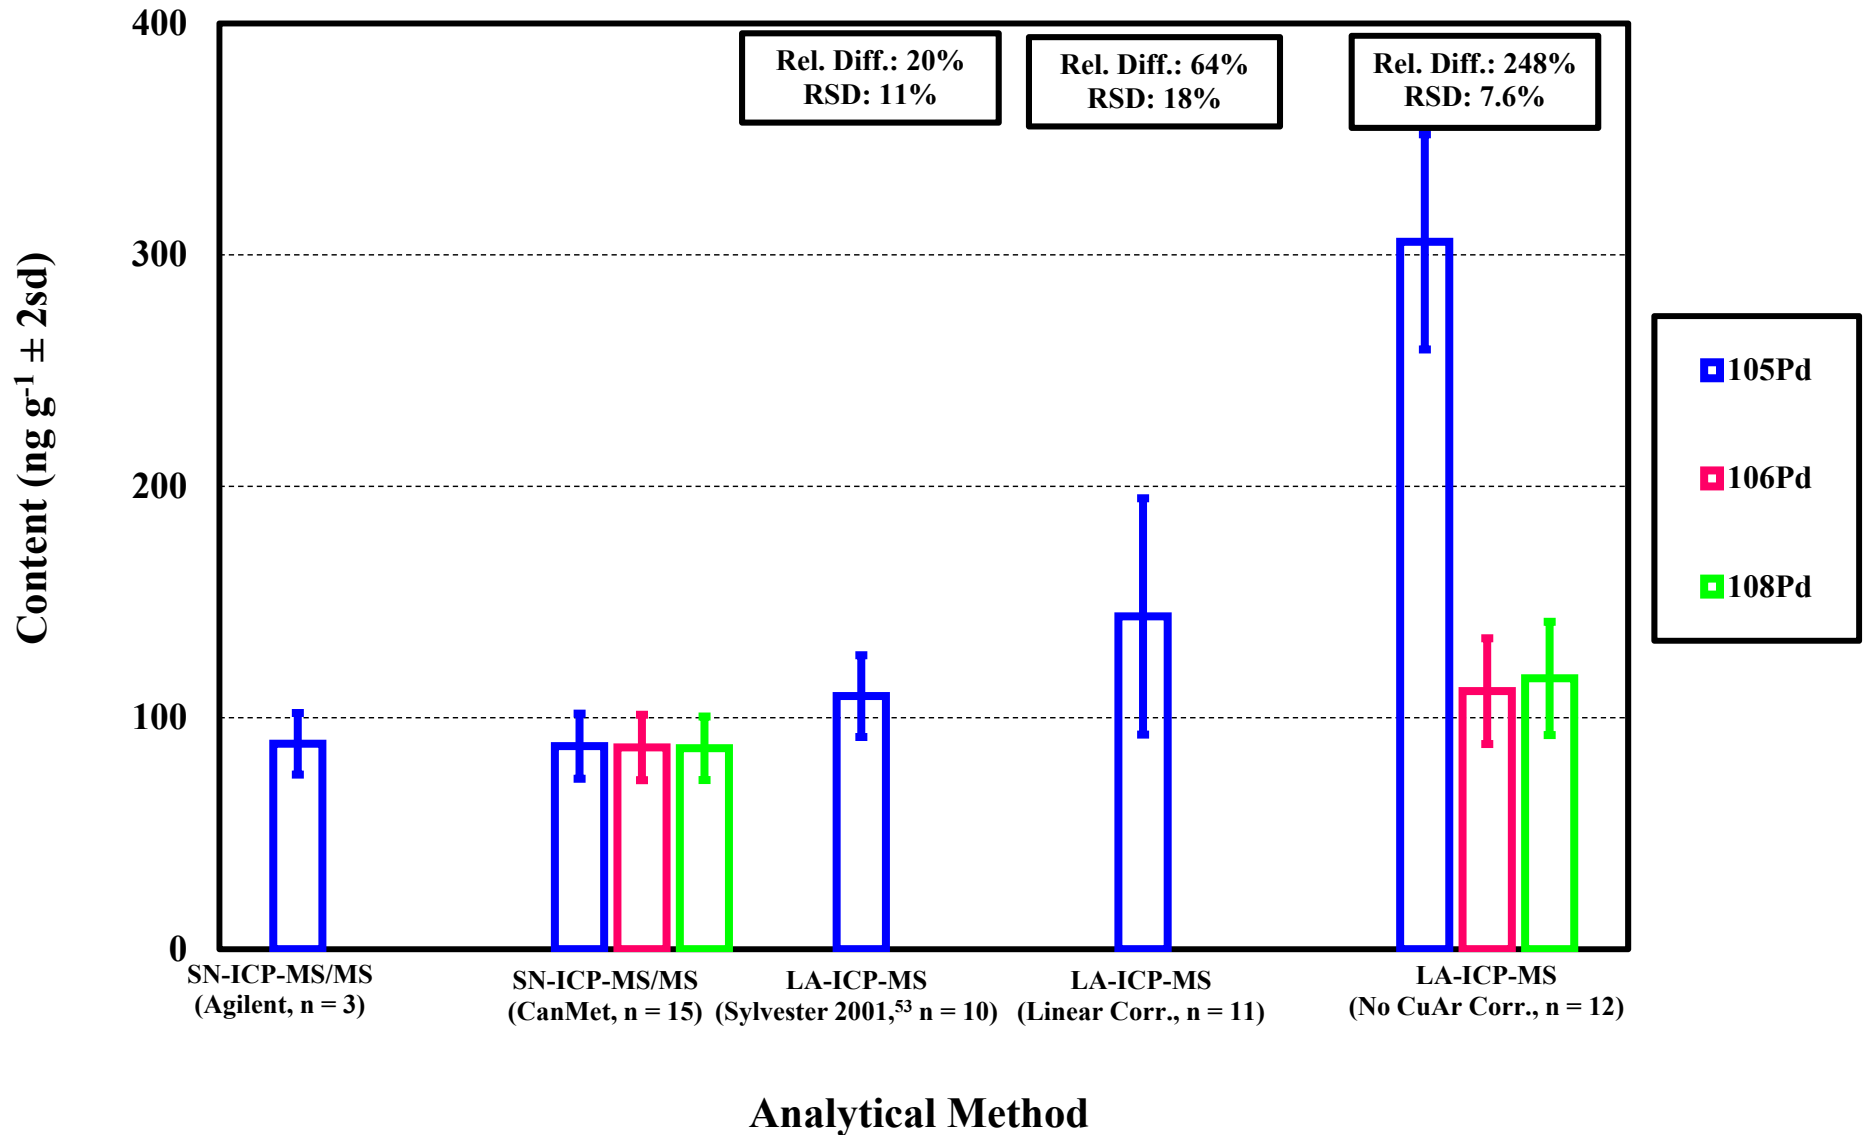

54

55 Supplementary Fig. 10-2† Pd content determination with and without the Sylvester (2001)<sup>53</sup> and linear CuAr interference correction  
 56 procedures for 7700x LA-ICP-MS PGE analysis of cubanite OSP6 (24.17% Cu).
