# Supplementary material for: Quantitative determination of trace level (ng g−1) contents of rhodium and palladium in copper-rich minerals using LA-ICP-MS
Source: Royal Society of Chemistry journal article supplement (doi:10.1039/c9ja00285e), 2020-01-01
Supplement: c9ja00285e2.pdf [file c9ja00285e2.pdf]

1 Supplementary Table 1† Spectral interferences on Ru, Rh and Pd in LA-ICP-MS PGE analysis.

| Interferences  |    | Ru                                                                                     |                                                                                                                                   |                                                                                                                                                                                 | Rh                                                                                                                                 | Pd                                                                                                                                  |                                                                                        |                                                                                                                                     |
|----------------|----|----------------------------------------------------------------------------------------|-----------------------------------------------------------------------------------------------------------------------------------|---------------------------------------------------------------------------------------------------------------------------------------------------------------------------------|------------------------------------------------------------------------------------------------------------------------------------|-------------------------------------------------------------------------------------------------------------------------------------|----------------------------------------------------------------------------------------|-------------------------------------------------------------------------------------------------------------------------------------|
|                |    | 99                                                                                     | 101                                                                                                                               | 102                                                                                                                                                                             | 103                                                                                                                                | 105                                                                                                                                 | 106                                                                                    | 108                                                                                                                                 |
| Argide         | Co | $^{59}\text{Co } ^{40}\text{Ar}^+$ (99.60*)                                            |                                                                                                                                   |                                                                                                                                                                                 |                                                                                                                                    |                                                                                                                                     |                                                                                        |                                                                                                                                     |
|                | Ni |                                                                                        | $^{61}\text{Ni } ^{40}\text{Ar}^+$ (1.13)                                                                                         | $^{62}\text{Ni } ^{40}\text{Ar}^+$ (3.58)                                                                                                                                       |                                                                                                                                    |                                                                                                                                     |                                                                                        |                                                                                                                                     |
|                | Cu | $^{63}\text{Cu } ^{36}\text{Ar}$ (0.23)                                                | $^{65}\text{Cu } ^{36}\text{Ar}^+$ (0.10)                                                                                         |                                                                                                                                                                                 | $^{63}\text{Cu } ^{40}\text{Ar}^+$ (68.89)                                                                                         | $^{65}\text{Cu } ^{40}\text{Ar}^+$ (30.71)                                                                                          |                                                                                        |                                                                                                                                     |
|                | Zn |                                                                                        |                                                                                                                                   |                                                                                                                                                                                 | $^{67}\text{Zn } ^{36}\text{Ar}^+$ (0.01)                                                                                          |                                                                                                                                     | $^{66}\text{Zn } ^{40}\text{Ar}^+$ (27.70)                                             | $^{68}\text{Zn } ^{40}\text{Ar}^+$ (18.72)                                                                                          |
| Isobaric       |    |                                                                                        |                                                                                                                                   | $^{102}\text{Pd}^+$ (1.02)                                                                                                                                                      |                                                                                                                                    |                                                                                                                                     | $^{106}\text{Cd}^+$ (1.20)                                                             | $^{108}\text{Cd}^+$ (0.90)                                                                                                          |
| Doubly Charged |    | $^{198}\text{Hg}^{++}$ (10.02)<br>$^{198}\text{Pt}^{++}$ (7.20)                        | $^{202}\text{Hg}^{++}$ (29.80)                                                                                                    | $^{204}\text{Hg}^{++}$ (6.85)<br>$^{204}\text{Pb}^{++}$ (1.40)                                                                                                                  | $^{206}\text{Pb}^{++}$ (24.10)                                                                                                     |                                                                                                                                     |                                                                                        |                                                                                                                                     |
| Oxide          |    |                                                                                        | $^{85}\text{Rb } ^{16}\text{O}^+$ (72.44)                                                                                         | $^{86}\text{Sr } ^{16}\text{O}^+$ (9.84)<br>$^{88}\text{Sr } ^{14}\text{O}^+$ (82.28)<br>$^{90}\text{Zr } ^{12}\text{O}^+$ (50.88)                                              | $^{85}\text{Rb } ^{18}\text{O}^+$ (0.14)<br>$^{87}\text{Rb } ^{16}\text{O}^+$ (27.77)<br>$^{87}\text{Sr } ^{16}\text{O}^+$ (6.98)  | $^{89}\text{Y } ^{16}\text{O}^+$ (99.76)                                                                                            | $^{88}\text{Sr } ^{18}\text{O}^+$ (16.52)<br>$^{90}\text{Zr } ^{16}\text{O}^+$ (51.30) | $^{90}\text{Zr } ^{18}\text{O}^+$ (10.30)<br>$^{92}\text{Zr } ^{16}\text{O}^+$ (17.17)<br>$^{92}\text{Mo } ^{16}\text{O}^+$ (14.77) |
| Hydride        |    | $^{98}\text{Mo } ^1\text{H}^+$ (24.13)                                                 | $^{100}\text{Mo } ^1\text{H}^+$ (9.63)<br>$^{100}\text{Ru } ^1\text{H}^+$ (12.60)                                                 | $^{101}\text{Ru } ^1\text{H}^+$ (17.00)                                                                                                                                         | $^{102}\text{Ru } ^1\text{H}^+$ (31.6)<br>$^{102}\text{Pd } ^1\text{H}^+$ (1.02)                                                   | $^{104}\text{Ru } ^1\text{H}^+$ (18.70)<br>$^{104}\text{Pd } ^1\text{H}^+$ (11.14)                                                  | $^{105}\text{Pd } ^1\text{H}^+$ (22.60)                                                | $^{107}\text{Ag } ^1\text{H}^+$ (51.75)                                                                                             |
| Hydroxide      |    |                                                                                        |                                                                                                                                   | $^{85}\text{Rb } ^{16}\text{O}^1\text{H}^+$ (71.98)                                                                                                                             | $^{86}\text{Sr } ^{16}\text{O}^1\text{H}^+$ (9.84)                                                                                 | $^{88}\text{Sr } ^{16}\text{O}^1\text{H}^+$ (82.37)                                                                                 | $^{89}\text{Y } ^{16}\text{O}^1\text{H}^+$ (99.70)                                     |                                                                                                                                     |
| Nitride        |    | $^{85}\text{Rb } ^{14}\text{N}^+$ (27.53)                                              | $^{87}\text{Rb } ^{14}\text{N}^+$ (27.73)<br>$^{87}\text{Sr } ^{14}\text{N}^+$ (6.97)                                             | $^{87}\text{Rb } ^{15}\text{N}^+$ (0.10)                                                                                                                                        | $^{88}\text{Sr } ^{15}\text{N}^+$ (0.30)<br>$^{89}\text{Y } ^{14}\text{N}^+$ (99.60)                                               | $^{90}\text{Zr } ^{15}\text{N}^+$ (0.19)<br>$^{91}\text{Zr } ^{14}\text{N}^+$ (11.18)                                               | $^{92}\text{Mo } ^{14}\text{N}^+$ (17.13)<br>$^{92}\text{Zr } ^{14}\text{N}^+$ (99.60) | $^{94}\text{Zr } ^{14}\text{N}^+$ (17.33)                                                                                           |
| Others         |    | $^{64}\text{Zn } ^{35}\text{Cl}^+$ (36.82)<br>$^{87}\text{Sr } ^{12}\text{C}^+$ (6.92) | $^{66}\text{Zn } ^{35}\text{Cl}^+$ (21.1)<br>$^{88}\text{Sr } ^{13}\text{C}^+$ (0.91)<br>$^{89}\text{Y } ^{12}\text{C}^+$ (98.90) | $^{94}\text{Zr } ^{12}\text{C}^+$ (4.88)<br>$^{89}\text{Y } ^{13}\text{C}^+$ (1.10)<br>$^{65}\text{Cu } ^{37}\text{Cl}^+$ (75.01)<br>$^{67}\text{Zn } ^{35}\text{Cl}^+$ (31.07) | $^{66}\text{Zn } ^{37}\text{Cl}^+$ (6.76)<br>$^{91}\text{Zr } ^{12}\text{C}^+$ (11.10)<br>$^{90}\text{Zr } ^{13}\text{C}^+$ (0.57) | $^{93}\text{Nb } ^{12}\text{C}^+$ (98.90)<br>$^{92}\text{Mo } ^{13}\text{C}^+$ (0.16)<br>$^{68}\text{Zn } ^{37}\text{Cl}^+$ (45.55) | $^{94}\text{Zr } ^{12}\text{C}^+$ (17.21)                                              | $^{96}\text{Ru } ^{12}\text{C}^+$ (5.46)<br>$^{96}\text{Mo } ^{12}\text{C}^+$ (16.52)                                               |

2 \*: Abundance in %.

3

4

5 Supplementary Table 2† Summary of reported limits of detection (LOD) for <sup>103</sup>Rh and <sup>105</sup>Pd and CuAr contributions in LA-ICP-MS PGE  
6 analysis of chalcopyrite.

| Published Applications                | ICP-MS                                                   | Collision and Reaction Cell Gas | Laser Ablation System                                         | Wave Length (nm) | Repetition Rate (Hz) | Energy Output (mJ pulse <sup>-1</sup> ) | Spot Size (µm) | Scan Mode | Internal Standard | LOD (ng g <sup>-1</sup> )           |                                       | CuAr Contribution (µg g <sup>-1</sup> ) |                   | CuAr Interference Correction    |
|---------------------------------------|----------------------------------------------------------|---------------------------------|---------------------------------------------------------------|------------------|----------------------|-----------------------------------------|----------------|-----------|-------------------|-------------------------------------|---------------------------------------|-----------------------------------------|-------------------|---------------------------------|
|                                       |                                                          |                                 |                                                               |                  |                      |                                         |                |           |                   | <sup>103</sup> Rh                   | <sup>105</sup> Pd                     | <sup>103</sup> Rh                       | <sup>105</sup> Pd |                                 |
| Alard et al., 2000 <sup>2</sup>       | Perkin Sciex ELAN 6000                                   | -                               | Nd:YAG                                                        | 266              | 4                    | 0.5                                     | 40 - 60        | Spot      | -                 | 24 <sup>a</sup><br>107 <sup>b</sup> | 39 <sup>a*</sup><br>320 <sup>b*</sup> | -                                       | -                 | -                               |
| Ballhaus et al., 2000 <sup>4</sup>    | VG Plasma QuaPQ2                                         | -                               | Lamda Physik Lex 120i ArF                                     | 266              | 10                   | -                                       | 70             | Line      | -                 | 10s                                 | 10s                                   | -                                       | -                 | No correction                   |
| Smith et al., 2014 <sup>5</sup>       | Thermo X Series 2                                        | No                              | New Wave UV                                                   | 213              | 10                   | 6 <sup>f</sup>                          | 30             | Line      | <sup>33</sup> S   | -                                   | -                                     | -                                       | -                 | Linear correlation <sup>d</sup> |
| Cabri et al., 2003 <sup>8</sup>       | VG Plasma Quad2S                                         | No                              | Nd:YAG                                                        | 266              | 10                   | 0.3                                     | 35 - 40        | Spot      | <sup>34</sup> S   | < 100                               | < 100                                 | -                                       | -                 | Sylvester (2001) <sup>53</sup>  |
| Barnes et al., 2006 <sup>15</sup>     | Thermo X7                                                | 7% H <sub>2</sub> + He          | Nd:YAG                                                        | 213              | 20                   | 0.4                                     | 80             | Spot      | <sup>34</sup> S   | 19 ± 49 (1sd) <sup>c</sup>          | 110 ± 40 (1sd) <sup>c</sup>           | -                                       | -                 | Linear correlation <sup>d</sup> |
| Godel et al., 2007 <sup>16</sup>      | Thermo X7                                                | 7% H <sub>2</sub> + He          | Nd:YAG                                                        | 213              | 20                   | 0.8                                     | 80             | Spot      | <sup>34</sup> S   | 60                                  | 350                                   | 2                                       | 2                 | Linear correlation <sup>d</sup> |
| Holwell et al., 2007 <sup>17</sup>    | Thermo X Series                                          | no                              | New Wave UV                                                   | 213              | 10                   | 0.3                                     | 40             | Spot      | <sup>33</sup> S   | 11                                  | 34 <sup>*</sup>                       | -                                       | -                 | Linear correlation <sup>d</sup> |
| Godel et al., 2008 <sup>18</sup>      | Thermo X7                                                | 7% H <sub>2</sub> + He          | Nd:YAG                                                        | 213              | 20                   | 0.3                                     | 80             | Spot      | <sup>34</sup> S   | -                                   | -                                     | 0.5                                     | 0.5               | Linear correlation <sup>d</sup> |
| Hutchinson et al., 2008 <sup>19</sup> | Thermo X Series                                          | No                              | NewWave UV                                                    | 213              | 10                   | 0.35                                    | 40             | Spot      | <sup>33</sup> S   | -                                   | -                                     | -                                       | -                 | -                               |
| Holwell et al., 2010 <sup>20</sup>    | Thermo X Series                                          | No                              | NewWave UV                                                    | 213              | 10                   | 0.35                                    | 40             | Spot      | -                 | -                                   | -                                     | -                                       | -                 | No correction                   |
| Dare et al., 2010 <sup>21</sup>       | Thermo X7                                                | -                               | Nd:YAG                                                        | 213              | 10                   | 0.3                                     | 80             | Spot      | <sup>57</sup> Fe  | 121 <sup>c</sup>                    | 293 <sup>c</sup>                      | -                                       | -                 | Linear correlation <sup>d</sup> |
| Holwell et al., 2011 <sup>22</sup>    | Thermo X Series                                          | No                              | New Wave UV                                                   | 213              | 10                   | 0.35                                    | 30 - 55        | Spot      | <sup>33</sup> S   | 11                                  | 34                                    | -                                       | -                 | -                               |
| Dare et al., 2011 <sup>23</sup>       | Thermo X7                                                | -                               | Nd:YAG                                                        | 213              | 10                   | 0.3                                     | 80             | Spot      | <sup>57</sup> Fe  | -                                   | -                                     | -                                       | -                 | -                               |
| Piña et al., 2012 <sup>24</sup>       | Thermo X7                                                | -                               | Nd:YAG                                                        | 213              | 10                   | 0.8                                     | 80             | Spot      | <sup>57</sup> Fe  | -                                   | -                                     | -                                       | -                 | -                               |
| Osahr et al., 2013 <sup>25</sup>      | Agilent 7500i                                            | -                               | New Wave UP                                                   | 193              | 15                   | 1.62 <sup>f</sup>                       | 35 - 50        | Spot      | S                 | -                                   | -                                     | 4 - 5                                   | 6 - 8             | Linear correlation <sup>d</sup> |
| Prichard et al., 2013 <sup>26</sup>   | Thermo X Series                                          | No                              | NewWave UV                                                    | 213              | 10                   | -                                       | 30             | Line      | <sup>33</sup> S   | 100                                 | -                                     | -                                       | -                 | Linear correlation <sup>d</sup> |
| Huminicki et al., 2008 <sup>27</sup>  | -                                                        | -                               | -                                                             | -                | -                    | -                                       | -              | -         | -                 | -                                   | -                                     | -                                       | -                 | Sylvester (2001) <sup>53</sup>  |
| Lorand et al., 2001 <sup>28</sup>     | Perkin Sciex ELAN 6000                                   | -                               | Nd:YAG                                                        | 266              | 4                    | 0.5                                     | 40 - 60        | Spot      | -                 | 24 <sup>a</sup>                     | 36 <sup>a*</sup>                      | -                                       | -                 | Linear correlation <sup>c</sup> |
| Guillong et al., 2011 <sup>35</sup>   | Agilent 7500<br>Agilent 7700<br>Thermo X7<br>PE 6100 DRC | No                              | NewWave UV<br>New Wave UP<br>Resonetics M50 ArF<br>Geolas ArF | 193<br>213       | 10                   | -                                       | 40             | Spot      | Cu                | -                                   | -                                     | 1.5 - 36                                | 4.0 - 92          | Linear correlation <sup>c</sup> |
| Cox et al., 2010 <sup>36</sup>        | Thermo X7                                                | 7% H <sub>2</sub> + He          | Nd:YAG                                                        | 213              | -                    | -                                       | 80             | Spot      | -                 | < 100                               | < 100                                 | -                                       | -                 | No correction                   |

7 <sup>a</sup>: LOD using He as a carrier gas; <sup>b</sup>: LOD using Ar carrier gas only; <sup>c</sup>: calculated based on the equation  $LOD = 3 \times (BC)^{1/2} \times C/I$ , where BC is background count rate in counts s<sup>-1</sup> (CuFeS<sub>2</sub> blank), I is counts s<sup>-1</sup>  
8 and C is a content of Rh or Pd from a calibration standard, and sd is standard deviation; <sup>d</sup>: linear correlation between CuAr and Cu signal using Cu-rich synthetic standard; <sup>e</sup>: linear correlation between CuAr  
9 and Cu signal using pure Cu metal standard; <sup>f</sup>: Fluence in J cm<sup>-2</sup>; \*: LOD for Pd but not specify which Pd isotope; -: Unknown.

10 Supplementary Table 3† Synthetic and natural Cu-rich mineral samples used for PGE analyses by SN-ICP-MS and LA-ICP-MS.

| Sources/Location                                               | Material           | Sample Name                                                        | Cu (%) <sup>*</sup>                             |             |       |
|----------------------------------------------------------------|--------------------|--------------------------------------------------------------------|-------------------------------------------------|-------------|-------|
| GSC, Canada                                                    | Synthetic sulphide | Cubanite (Cbn, CuFe <sub>2</sub> S <sub>3</sub> )                  | OSP6                                            | 24.17       |       |
|                                                                |                    | Mooihoekite (Mh, Cu <sub>9</sub> Fe <sub>9</sub> S <sub>16</sub> ) | OSP7                                            | 35.87       |       |
|                                                                |                    | Bornite (Bn, Cu <sub>5</sub> FeS <sub>4</sub> )                    | OSP9                                            | 62.19       |       |
| Creighton mine (footwall), Sudbury Ni-Cu camp, Ontario, Canada | Natural sulphide   | Chalcopyrite (Ccp, CuFeS <sub>2</sub> )                            | CNMC CRG-1902                                   | 34.52       |       |
| Cavnic, Romania                                                |                    |                                                                    | CMNMC 31802                                     | 33.77       |       |
| French Creek Mine, Pennsylvania, USA                           |                    |                                                                    | CMNMC 31805                                     | 34.46       |       |
| Sherritt-Gordon Mine, Manitoba, Canada                         |                    |                                                                    | CMNMC 31819                                     | 34.57       |       |
| Magma Mine, Superior, Arizona, USA                             |                    |                                                                    | CMNMC 57165                                     | 34.61       |       |
| Pima, Tucson, Arizona, USA                                     |                    |                                                                    | CMNMC 57199                                     | 34.55       |       |
| Ani Mine, Akita, Japan                                         |                    |                                                                    | CMNMC 80822                                     | 34.61       |       |
| Leeds Tp., Mégantic Co., Québec, Canada                        |                    |                                                                    | Bornite (Bn, Cu <sub>5</sub> FeS <sub>4</sub> ) | CMNMC 42116 | 63.31 |
| Harvey Hill Mine, Québec, Canada                               |                    |                                                                    |                                                 | CMNMC 58944 | 62.99 |

11 <sup>\*</sup>: EMPA data.

12

13

14

15

16 Table 4† Laser ablation systems operating and data acquisition parameters.

| <b>Manufacturer</b>                             | <b>Teledyne Photon Machines</b>  | <b>ESI NWR</b>     |
|-------------------------------------------------|----------------------------------|--------------------|
| Model                                           | ArF Excimer G2                   | Nd:YAG Solid State |
| Type of sample cell                             | Fast washout two-volume HelEx II | Two-volume         |
| Wavelengths (nm)                                | 193                              | 213                |
| Frequency (Hz)                                  | 10                               | 10                 |
| Pulse width (ns)                                | < 5                              | 4                  |
| Fluence (J cm <sup>-2</sup> )                   | 3.78 - 4.25                      | 1.66 - 3.80        |
| Spot size (μm)                                  | 10, 20, 30, 40, 50, 65 and 110   | 110                |
| Scan mode                                       | Line and spot                    | Line and spot      |
| Line scan speed (μm s <sup>-1</sup> )           | 1                                | 3                  |
| He Carrier gas flow rate (L min <sup>-1</sup> ) | MFC-1: 0.6; MFC-2: 0.4           | 0.7                |

17

18

19

20

21

22

23

24

25

26 Table 5† ICP-MS operating and data acquisition parameters.

| Analysis Type                                   |                                       | LA-ICP-MS   |                           |                                  | SN-ICP-MS              |                            |               |                 |     |                 |
|-------------------------------------------------|---------------------------------------|-------------|---------------------------|----------------------------------|------------------------|----------------------------|---------------|-----------------|-----|-----------------|
| Laboratory                                      |                                       | GSC Canada  |                           | Agilent Technologies Canada Inc. |                        |                            | CANMET Canada |                 |     |                 |
| Agilent ICP-MS model                            |                                       | 7700x       |                           | 8900x MS/MS                      |                        | 8800x MS/MS                |               |                 |     |                 |
| Sampling depth (mm)                             |                                       | 6.5         |                           | 8.0                              |                        | 8.0                        |               | 5.9 - 8         |     |                 |
| Ar carrier gas flow rate (L min <sup>-1</sup> ) |                                       | 1.02 - 1.04 |                           | 0.9                              |                        | 1.05                       |               | 1.05            |     |                 |
| Collision mode only                             | Scan type                             | On-mass     |                           |                                  | On-mass                |                            |               |                 |     |                 |
|                                                 | Gas type                              | No gas      | He                        |                                  | He                     |                            | He            |                 |     |                 |
|                                                 | Gas flow rate (mL min <sup>-1</sup> ) | 0           | 1, 2, 3, 4, 5, 6, 7, 8, 9 |                                  | 6                      |                            | 6             |                 |     |                 |
|                                                 | Octopole bias (V)                     | -5.8        | -18                       |                                  | -18                    |                            | -24           |                 |     |                 |
|                                                 | Octp RF (V)                           | 200         | 200                       |                                  | 200                    |                            | 200           |                 |     |                 |
|                                                 | KED (V)                               |             | 5                         |                                  | 5                      |                            | 7             |                 |     |                 |
| Collision and reaction mode                     | Scan type                             |             |                           |                                  | On-mass and Mass-shift |                            |               |                 |     |                 |
|                                                 | Gas type                              |             |                           |                                  | He                     | NH <sub>3</sub>            | He            | NH <sub>3</sub> | He  | NH <sub>3</sub> |
|                                                 | Gas flow rate (mL min <sup>-1</sup> ) |             |                           |                                  | 1                      | 0, 0.1, 0.2, 0.3, 0.4, 0.5 | 2             | 0.3             | 1   | 0.2 - 0.3       |
|                                                 | Octopole bias (V)                     |             |                           |                                  | -5                     |                            | -4            |                 | -6  |                 |
|                                                 | Octp RF (V)                           |             |                           |                                  | 180                    |                            | 140           |                 | 170 |                 |
|                                                 | KED (V)                               |             |                           |                                  | -7                     |                            | -7            |                 | -9  |                 |

27

28

| Analysis Type                  | LA-ICP-MS                                                                                                                                                                                                                                                                                                                                                                                                                                                                                                                                                                                                                                                                                                                                                     |                                                                                                                                                                                                                                                                                                                                                                                                                                                                                                                                                                                                                                                                                                                                            | SN-ICP-MS                                                                                                                                                                                                                                                                                  |                                                                                                                                                                                                                                                                                                                                                                                                                                                                                                                                                                                                                                                                                                                                                                                                            |
|--------------------------------|---------------------------------------------------------------------------------------------------------------------------------------------------------------------------------------------------------------------------------------------------------------------------------------------------------------------------------------------------------------------------------------------------------------------------------------------------------------------------------------------------------------------------------------------------------------------------------------------------------------------------------------------------------------------------------------------------------------------------------------------------------------|--------------------------------------------------------------------------------------------------------------------------------------------------------------------------------------------------------------------------------------------------------------------------------------------------------------------------------------------------------------------------------------------------------------------------------------------------------------------------------------------------------------------------------------------------------------------------------------------------------------------------------------------------------------------------------------------------------------------------------------------|--------------------------------------------------------------------------------------------------------------------------------------------------------------------------------------------------------------------------------------------------------------------------------------------|------------------------------------------------------------------------------------------------------------------------------------------------------------------------------------------------------------------------------------------------------------------------------------------------------------------------------------------------------------------------------------------------------------------------------------------------------------------------------------------------------------------------------------------------------------------------------------------------------------------------------------------------------------------------------------------------------------------------------------------------------------------------------------------------------------|
| Data acquisition mode          | Time resolved analysis                                                                                                                                                                                                                                                                                                                                                                                                                                                                                                                                                                                                                                                                                                                                        |                                                                                                                                                                                                                                                                                                                                                                                                                                                                                                                                                                                                                                                                                                                                            | Spectrum                                                                                                                                                                                                                                                                                   |                                                                                                                                                                                                                                                                                                                                                                                                                                                                                                                                                                                                                                                                                                                                                                                                            |
| Scan mode                      | Peak hopping                                                                                                                                                                                                                                                                                                                                                                                                                                                                                                                                                                                                                                                                                                                                                  |                                                                                                                                                                                                                                                                                                                                                                                                                                                                                                                                                                                                                                                                                                                                            |                                                                                                                                                                                                                                                                                            |                                                                                                                                                                                                                                                                                                                                                                                                                                                                                                                                                                                                                                                                                                                                                                                                            |
| Isotopes monitored (On-mass)   | <sup>29</sup> Na, <sup>25</sup> Mg, <sup>27</sup> Al, <sup>29</sup> Si, <sup>34</sup> S, <sup>42</sup> Ca, <sup>55</sup> Mn, <sup>57</sup> Fe, <sup>59</sup> Co, <sup>60</sup> Ni, <sup>62</sup> Ni, <sup>63</sup> Cu, <sup>65</sup> Cu, <sup>66</sup> Zn, <sup>68</sup> Zn, <sup>75</sup> As, <sup>85</sup> Rb, <sup>88</sup> Sr, <sup>89</sup> Y, <sup>90</sup> Zr, <sup>93</sup> Nb, <sup>95</sup> Mo, <sup>99</sup> Ru, <sup>101</sup> Ru, <sup>102</sup> Ru, <sup>103</sup> Rh, <sup>105</sup> Pd, <sup>106</sup> Pd, <sup>107</sup> Ag, <sup>108</sup> Pd, <sup>108</sup> Pd, <sup>109</sup> Ag, <sup>111</sup> Cd, <sup>189</sup> Os, <sup>193</sup> Ir, <sup>195</sup> Pt, <sup>197</sup> Au, <sup>202</sup> Hg, <sup>206</sup> Pb, <sup>208</sup> Pb | <sup>23</sup> Na, <sup>25</sup> Mg, <sup>27</sup> Al, <sup>29</sup> Si, <sup>34</sup> S, <sup>39</sup> K, <sup>42</sup> Ca, <sup>57</sup> Fe, <sup>59</sup> Co, <sup>60</sup> Ni, <sup>62</sup> Ni, <sup>63</sup> Cu, <sup>65</sup> Cu, <sup>66</sup> Zn, <sup>68</sup> Zn, <sup>85</sup> Rb, <sup>88</sup> Sr, <sup>89</sup> Y, <sup>90</sup> Zr, <sup>93</sup> Nb, <sup>95</sup> Mo, <sup>99</sup> Ru, <sup>101</sup> Ru, <sup>102</sup> Ru, <sup>103</sup> Rh, <sup>105</sup> Pd, <sup>106</sup> Pd, <sup>108</sup> Pd, <sup>109</sup> Ag, <sup>111</sup> Cd, <sup>175</sup> Lu, <sup>177</sup> Hf, <sup>189</sup> Os, <sup>191</sup> Ir, <sup>193</sup> Ir, <sup>195</sup> Pt, <sup>197</sup> Au, <sup>198</sup> Pt, <sup>206</sup> Pb | <sup>99</sup> Ru, <sup>101</sup> Ru, <sup>102</sup> Ru, <sup>103</sup> Rh, <sup>105</sup> Pd, <sup>106</sup> Pd, <sup>107</sup> Ag, <sup>108</sup> Pd, <sup>109</sup> Ag, <sup>111</sup> Cd, <sup>191</sup> Ir, <sup>193</sup> Ir, <sup>195</sup> Pt, <sup>197</sup> Au, <sup>198</sup> Pt | <sup>59</sup> Co, <sup>60</sup> Ni, <sup>62</sup> Ni, <sup>66</sup> Zn, <sup>68</sup> Zn, <sup>69</sup> Ga, <sup>71</sup> Ga, <sup>72</sup> Ge, <sup>73</sup> Ge, <sup>85</sup> Rb, <sup>88</sup> Sr, <sup>89</sup> Y, <sup>90</sup> Zr, <sup>93</sup> Nb, <sup>95</sup> Mo, <sup>99</sup> Ru, <sup>101</sup> Ru, <sup>102</sup> Ru, <sup>103</sup> Rh, <sup>105</sup> Pd, <sup>106</sup> Pd, <sup>107</sup> Ag, <sup>108</sup> Pd, <sup>109</sup> Ag, <sup>111</sup> Cd, <sup>140</sup> Ce, <sup>173</sup> Yb, <sup>175</sup> Lu, <sup>177</sup> Hf, <sup>181</sup> Ta, <sup>182</sup> W, <sup>188</sup> Os, <sup>191</sup> Ir, <sup>193</sup> Ir, <sup>195</sup> Pt, <sup>197</sup> Au, <sup>198</sup> Pt, <sup>205</sup> Tl, <sup>206</sup> Pb, <sup>207</sup> Pb, <sup>208</sup> Pb, <sup>209</sup> Bi |
| Isotope monitored (Mass-shift) |                                                                                                                                                                                                                                                                                                                                                                                                                                                                                                                                                                                                                                                                                                                                                               | <sup>197</sup> Au → <sup>231</sup> Au                                                                                                                                                                                                                                                                                                                                                                                                                                                                                                                                                                                                                                                                                                      | <sup>103</sup> Rh → <sup>171</sup> Rh<br><sup>195</sup> Pt → <sup>229</sup> Pt<br><sup>197</sup> Au → <sup>231</sup> Au                                                                                                                                                                    | <sup>103</sup> Rh → <sup>171</sup> Rh<br><sup>188</sup> Os → <sup>203</sup> Os<br><sup>189</sup> Os → <sup>204</sup> Os<br><sup>191</sup> Ir → <sup>206</sup> Ir<br><sup>193</sup> Ir → <sup>208</sup> Ir<br><sup>195</sup> Pt → <sup>229</sup> Pt<br><sup>197</sup> Au → <sup>231</sup> Au<br><sup>198</sup> Pt → <sup>232</sup> Pt                                                                                                                                                                                                                                                                                                                                                                                                                                                                       |
| Dwell time per isotope         | 50 ms (Rh); 30 ms (Pd); 10 ms (other PGE, Ag and Au); 3 - 10 ms (majors and other traces)                                                                                                                                                                                                                                                                                                                                                                                                                                                                                                                                                                                                                                                                     | 50 ms (Rh); 30 ms (Pd); 15 ms (Cd); 10 ms (Co, Ni, Zn, other PGE, Ag and Au); 5 ms (S, Fe, Cu and Pb); 3 ms (other traces); 1 - 2 ms (majors)                                                                                                                                                                                                                                                                                                                                                                                                                                                                                                                                                                                              | 80 ms (Rh, Pd); 20 ms (other PGE, Ag and Au)                                                                                                                                                                                                                                               | 1 s (Rh, Pd and Cd); 0.4 s (others)                                                                                                                                                                                                                                                                                                                                                                                                                                                                                                                                                                                                                                                                                                                                                                        |

30

31

32

33

34 Supplementary Table 6† Background equivalent contents (BECs, ng g<sup>-1</sup>) in Zn, Rb, Sr, Y, Zr and Mo (100 µg g<sup>-1</sup>) and Cu (700 to 1000 µg  
 35 g<sup>-1</sup>) matrix blank using 8800x SN-ICP-MS/MS in He collision gas and NH<sub>3</sub>/He reaction gas mode.

| Element                         | Rh      |                 |                       |                 | Pd      |                 |                       |                 |                       |                 |         |                 |
|---------------------------------|---------|-----------------|-----------------------|-----------------|---------|-----------------|-----------------------|-----------------|-----------------------|-----------------|---------|-----------------|
|                                 | 103     |                 |                       |                 | 105     |                 |                       |                 | 106                   |                 | 108     |                 |
| Collision and Reaction Gas Mode | [He]    |                 | [NH <sub>3</sub> /He] |                 | [He]    |                 | [NH <sub>3</sub> /He] |                 | [NH <sub>3</sub> /He] |                 |         |                 |
|                                 | Mean    | SD <sup>a</sup> | Mean                  | SD <sup>a</sup> | Mean    | SD <sup>a</sup> | Mean                  | SD <sup>a</sup> | Mean                  | SD <sup>a</sup> | Mean    | SD <sup>a</sup> |
| Zn (n = 6)                      | 0.0035  | 0.0029          | 0.00037               | 0.000031        | 0.0026  | 0.00017         | 0.0031                | 0.00028         | 0.0032                | 0.00028         | 0.0030  | 0.00025         |
| Rb (n = 6)                      | 0.0007  | 0.00014         | 0.00077               | 0.00015         | 0.0018  | 0.00056         | 0.0018                | 0.00029         | 0.0022                | 0.00039         | 0.0019  | 0.00026         |
| Sr (n = 6)                      | 0.0060  | 0.0018          | 0.0538                | 0.0017          | 0.102   | 0.0061          | 2.15                  | 0.0339          | 0.0053                | 0.00060         | 0.0063  | 0.0040          |
| Y (n = 6)                       | 0.0031  | 0.00016         | 0.0028                | 0.00021         | 15.76   | 1.36            | 5.46                  | 0.191           | 1.44                  | 0.088           | 0.0053  | 0.0008          |
| Zr (n = 6)                      | 0.0018  | 0.00068         | 0.0014                | 0.00046         | 0.0032  | 0.00045         | 0.0110                | 0.00057         | 5.85                  | 0.299           | 2.08    | 0.101           |
| Nb (n = 6)                      | 0.00090 | 0.00024         | 0.00072               | 0.00012         | 0.00075 | 0.00010         | 0.0014                | 0.00018         | 0.0013                | 0.00012         | 0.0041  | 0.00013         |
| Mo (n = 6)                      | 0.0025  | 0.0016          | 0.0018                | 0.0010          | 0.0028  | 0.0008          | 0.0028                | 0.00071         | 0.0037                | 0.00040         | 0.046   | 0.0010          |
| Ag (n = 6)                      | 0.0014  | 0.000057        | 0.0015                | 0.000059        | 0.0022  | 0.0012          | 0.0028                | 0.0013          | 0.0024                | 0.00080         | 0.0021  | 0.0010          |
| Pb (n = 6)                      | 6.26    | 0.212           | 0.00052               | 0.00012         | 0.0031  | 0.0004          | 0.0035                | 0.0008          | 0.0033                | 0.00081         | 0.0034  | 0.00032         |
| 700 Cu <sup>b</sup> (n = 15)    | 0.00238 | 0.00006         | 0.00040               | 0.0001          | 0.0062  | 0.0005          | 0.00040               | 0.0003          | 0.00133               | 0.0004          | 0.00122 | 0.0003          |
| 1000 Cu <sup>c</sup> (n = 15)   | 0.0046  | 0.0011          | 0.00030               | 0.0002          | 0.0108  | 0.0028          | 0.00030               | 0.0004          | 0.00125               | 0.0008          | 0.00144 | 0.0005          |

36 <sup>a</sup>: standard deviation; <sup>b</sup>: 700 µg g<sup>-1</sup> Cu; <sup>c</sup>: 1000 µg g<sup>-1</sup> Cu; n: number of analysis.

37

38 Supplementary Table 7† Element content (in  $\mu\text{g g}^{-1}$ ) of Mass-1 determined using 7700x LA-ICP-MS and 8900x LA-ICP-MS/MS at spot  
 39 size of 110  $\mu\text{m}$ .

| <b>Analysis Mode</b>                                                                                                | <b>Items</b>                | <b>Co</b> | <b>Ni</b> | <b>Cu</b> | <b>Zn</b> | <b>Mo</b> | <b>Ag</b> | <b>Cd</b> | <b>Os</b> | <b>Ir</b> | <b>Pt</b> | <b>Au</b> | <b>Pb</b> |      |
|---------------------------------------------------------------------------------------------------------------------|-----------------------------|-----------|-----------|-----------|-----------|-----------|-----------|-----------|-----------|-----------|-----------|-----------|-----------|------|
| <b>Information value<br/>(GeoRem 2002,<br/>compiled value<sup>56</sup>)</b>                                         | Mean                        | 67        | 71 - 102  | 134000    | 210000    | 61        | 67        | 70        | 0.031     | 64        | 62        | 47        | 67 - 80   |      |
| <b>7700x LA-ICP-MS<br/>No gas mode</b>                                                                              | Mean                        | 66        | 161       | 118298    | 183034    | 57        | 54        | 29        | 0.006     | 75        | 68        | 45        | 77        |      |
|                                                                                                                     | SD <sup>a</sup>             | 1.9       | 62        | 5603      | 9487      | 1.3       | 1.5       | 5         | 0.004     | 1.8       | 1.7       | 2.6       | 4         |      |
|                                                                                                                     | RSD (%)                     | 3         | 39        | 5         | 5         | 2.3       | 3         | 17        | 78        | 2.4       | 3         | 6         | 6         |      |
|                                                                                                                     | n                           | 38        | 38        | 38        | 38        | 38        | 38        | 38        | 38        | 38        | 38        | 38        | 38        | 38   |
|                                                                                                                     | Rel. Diff. (%) <sup>b</sup> | -2        | 86        | -12       | -13       | -6        | -20       | -58       | -82       | -82       | 18        | 10        | -5        | 4.01 |
| <b>7700x LA-ICP-MS<br/>He collision gas mode<br/>(He = 5 mL min<sup>-1</sup>)</b>                                   | Mean                        | 73        | 136       | 99765     | 196846    | 58        | 55        | 27        | 0.007     | 68        | 62        | 46        | 76        |      |
|                                                                                                                     | SD <sup>a</sup>             | 6         | 43        | 14988     | 24118     | 2.30      | 1.5       | 5         | 0.006     | 3         | 3         | 5.99      | 2.58      |      |
|                                                                                                                     | RSD (%)                     | 8         | 31        | 15        | 12        | 4         | 3         | 17        | 83        | 4         | 5         | 13        | 3         |      |
|                                                                                                                     | n                           | 23        | 23        | 23        | 23        | 23        | 23        | 23        | 23        | 20        | 23        | 23        | 23        | 23   |
|                                                                                                                     | Rel. Diff. (%) <sup>b</sup> | 9         | 57        | -26       | -6        | -5        | -17       | -62       | -78       | -78       | 7         | 0.1       | -5        | -3.8 |
| <b>8900x LA-ICP-MS/MS<br/>No gas mode</b>                                                                           | Mean                        |           |           |           |           | 60        | 65        | 37        | 0.0026    | 65        | 58        | 54        | 81        |      |
|                                                                                                                     | SD <sup>a</sup>             |           |           |           |           | 0.5       | 0.3       | 2.8       | 0.0009    | 1.4       | 2.8       | 2.4       | 0.6       |      |
|                                                                                                                     | RSD (%)                     |           |           |           |           | 0.8       | 0.5       | 8         | 34        | 2.2       | 5         | 4         | 0.7       |      |
|                                                                                                                     | n                           |           |           |           |           | 2         | 2         | 2         | 5         | 6         | 6         | 6         | 2         |      |
|                                                                                                                     | Rel. Diff. (%) <sup>b</sup> |           |           |           |           | -1        | -2        | -47       | -92       | 2         | -6        | 15        | 11        |      |
| <b>8900x LA-ICP-MS/MS<br/>NH<sub>3</sub>/He reaction gas mode<br/>(NH<sub>3</sub>/He = 0.3 mL min<sup>-1</sup>)</b> | Mean                        | 70        | 103       | 145444    | 265441    | 60        | 73        | 49        | 0.0104    | 64        | 58        | 54        | 86        |      |
|                                                                                                                     | SD <sup>a</sup>             | 1.9       | 1.8       | 3513      | 9575      | 1.5       | 1.7       | 6         | 0.013     | 0.9       | 2.5       | 3         | 2.2       |      |
|                                                                                                                     | RSD (%)                     | 3         | 1.7       | 2.4       | 4         | 2.5       | 2.3       | 11        | 122       | 1.4       | 4         | 6         | 3         |      |
|                                                                                                                     | n                           | 7         | 7         | 7         | 7         | 7         | 7         | 7         | 7         | 8         | 11        | 11        | 11        | 7    |
|                                                                                                                     | Rel. Diff. (%) <sup>b</sup> | 4         | 19        | 9         | 26        | -1        | 9         | -30       | -67       | -67       | 1         | -5        | 16        | 16   |

40 <sup>a</sup>: standard deviation; <sup>b</sup>: the relative difference of element value determined by LA-ICP-MS against the value obtained by SN-ICP-MS; n: number of analysis.



41 Supplementary Table 8† Element content (in  $\mu\text{g g}^{-1}$ ) of PGE-1B using 7700x LA-ICP-MS and 8900x LA-ICP-MS/MS at spot size of 110  
 42  $\mu\text{m}$ , and 8800x SN-ICP-MS/MS analysis.

| <b>Analysis Mode</b>                                                                                                | <b>Items</b>                | <b>Ru</b> | <b>Rh</b> | <b>Pd</b> | <b>Os</b> | <b>Ir</b> | <b>Pt</b> | <b>Au</b> |
|---------------------------------------------------------------------------------------------------------------------|-----------------------------|-----------|-----------|-----------|-----------|-----------|-----------|-----------|
| <b>8800x SN-ICP-MS/MS<br/>NH<sub>3</sub>/He reaction gas mode</b>                                                   | Mean                        | 233       | 257       | 263       | 72.6      | 135       | 196       | 367       |
|                                                                                                                     | SD <sup>a</sup>             | 5         | 6         | 4         | 9         | 6         | 4         | 5         |
|                                                                                                                     | RSD (%)                     | 2.2       | 2.2       | 1.4       | 12        | 4         | 1.9       | 1.4       |
|                                                                                                                     | n                           | 40        | 40        | 60        | 20        | 60        | 40        | 18        |
| <b>7700x LA-ICP-MS<br/>No gas mode</b>                                                                              | Mean                        | 235       | 252       | 244       | 115       | 159       | 196       | 332       |
|                                                                                                                     | SD <sup>a</sup>             | 14        | 17        | 13        | 31        | 23        | 14        | 20        |
|                                                                                                                     | RSD (%)                     | 6         | 7         | 5         | 27        | 14        | 7         | 6         |
|                                                                                                                     | n                           | 38        | 38        | 38        | 38        | 38        | 38        | 38        |
|                                                                                                                     | Rel. Diff. (%) <sup>b</sup> | 2         | -2        | -7        | 58        | 18        | -0.1      | -10       |
| <b>7700x LA-ICP-MS<br/>He collision gas mode<br/>(He = 5 mL min<sup>-1</sup>)</b>                                   | Mean                        | 247       | 250       | 253       | 106       | 159       | 202       | 320       |
|                                                                                                                     | SD <sup>a</sup>             | 9         | 7         | 10        | 21        | 8         | 9         | 7         |
|                                                                                                                     | RSD (%)                     | 3         | 3         | 4         | 20        | 5         | 5         | 2         |
|                                                                                                                     | n                           | 30        | 30        | 30        | 30        | 30        | 30        | 30        |
|                                                                                                                     | Rel. Diff. (%) <sup>b</sup> | 7         | -2.7      | -4        | 46        | 18        | 3         | -13       |
| <b>8900x LA-ICP-MS/MS<br/>No gas mode</b>                                                                           | Mean                        | 222       | 213       | 229       | 77        | 147       | 175       | 259       |
|                                                                                                                     | SD <sup>a</sup>             | 6         | 8         | 3         | 17        | 14        | 2.3       | 5         |
|                                                                                                                     | RSD (%)                     | 2.5       | 4.0       | 1.0       | 22.0      | 10.0      | 1.0       | 2.0       |
|                                                                                                                     | n                           | 4         | 4         | 4         | 3         | 4         | 4         | 4         |
|                                                                                                                     | Rel. Diff. (%) <sup>b</sup> | -4        | -17       | -13       | 6         | 9         | -11       | -29       |
| <b>8900x LA-ICP-MS/MS<br/>NH<sub>3</sub>/He reaction gas mode<br/>(NH<sub>3</sub>/He = 0.3 mL min<sup>-1</sup>)</b> | Mean                        | 219       | 213       | 223       | 91.4      | 148       | 180       | 267       |
|                                                                                                                     | SD <sup>a</sup>             | 1.7       | 4         | 4         | 20        | 12        | 5         | 6         |
|                                                                                                                     | RSD (%)                     | 1.0       | 2.0       | 2.0       | 22.0      | 8.0       | 3.0       | 2.0       |
|                                                                                                                     | n                           | 6         | 6         | 6         | 6         | 6         | 6         | 6         |
|                                                                                                                     | Rel. Diff. (%) <sup>b</sup> | -5        | -17       | -15       | 26        | 10        | -8        | -27       |

43 <sup>a</sup>: standard deviation; <sup>b</sup>: the relative difference of element value determined by LA-ICP-MS against the value obtained by SN-ICP-MS; n: number of analysis.

44 Supplementary Table 9† PGE content (ng g<sup>-1</sup>) determined using 8800x SN-ICP-MS/MS from this study vs. certified or recommended  
45 values (± 95% confidence intervals) for geological reference material PTM-1a<sup>58</sup>.

| Element   | PTM-1a                 |            |    |         |                             |
|-----------|------------------------|------------|----|---------|-----------------------------|
|           | Certified              | This Study | n  | RSD (%) | Rel. Diff. (%) <sup>b</sup> |
| <b>Ru</b> | 700 ± 400 <sup>a</sup> | 695        | 44 | 8       | -0.8                        |
| <b>Rh</b> | 940 ± 90 <sup>a</sup>  | 967        | 30 | 7       | 3.0                         |
| <b>Pd</b> | 10070 ± 410            | 10200      | 89 | 8       | 1.3                         |
| <b>Ir</b> | 350 ± 90 <sup>a</sup>  | 375        | 66 | 11      | 7.0                         |
| <b>Pt</b> | 7290 ± 220             | 7027       | 59 | 11      | 3.6                         |
| <b>Au</b> | 3300 ± 200             | 3536       | 33 | 11      | 2.2                         |

46 <sup>a</sup>: provisional values;<sup>58</sup> <sup>b</sup>: the relative difference of element value determined by LA-ICP-MS against the value obtained by SN-ICP-MS; n: number of analysis.

47

48

49

50

51

52

53

54

55

56 Supplementary Table 10† Precision and accuracy in analyzing 0.1, 1 and 10 ng g<sup>-1</sup> PGE in 1000 µg g<sup>-1</sup> Cu matrix determined using 8800x  
 57 SN-ICP-MS/MS.

| Element                 | 0.1 ng g <sup>-1</sup> PGE |   |         |                             | 1 ng g <sup>-1</sup> PGE |   |         |                             | 10 ng g <sup>-1</sup> PGE |   |         |                             |
|-------------------------|----------------------------|---|---------|-----------------------------|--------------------------|---|---------|-----------------------------|---------------------------|---|---------|-----------------------------|
|                         | Measured                   | n | RSD (%) | Rel. Diff. (%) <sup>a</sup> | Measured                 | n | RSD (%) | Rel. Diff. (%) <sup>a</sup> | Measured                  | n | RSD (%) | Rel. Diff. (%) <sup>a</sup> |
| <b>Ru</b>               | 0.088                      | 5 | 9       | -12                         | 0.93                     | 5 | 2.1     | -7.0                        | 9.4                       | 5 | 2.6     | -6.0                        |
| <b>Rh</b>               | 0.087                      | 5 | 4       | -13                         | 0.91                     | 5 | 4       | -9.0                        | 9.3                       | 5 | 4       | -8.0                        |
| <b><sup>105</sup>Pd</b> | 0.111                      | 5 | 8%      | 11                          | 0.93                     | 5 | 3       | -7.0                        | 9.2                       | 5 | 3       | -9.0                        |
| <b><sup>106</sup>Pd</b> | 0.111                      | 5 | 5       | 11                          | 0.92                     | 5 | 4       | -8.0                        | 9.2                       | 5 | 3       | -8.0                        |
| <b><sup>108</sup>Pd</b> | 0.108                      | 5 | 6       | 8                           | 0.93                     | 5 | 3       | -7.0                        | 9.2                       | 5 | 2.3     | -8.0                        |
| <b>Os</b>               | 0.098                      | 5 | 11      | -1.6                        | 1.03                     | 5 | 4       | 2.7                         | 9.8                       | 5 | 2.2     | -1.6                        |
| <b>Ir</b>               | 0.119                      | 5 | 6       | 19                          | 1.24                     | 5 | 3       | 24                          | 12                        | 5 | 2.0     | 21                          |
| <b>Pt</b>               | 0.106                      | 5 | 4       | 6.0                         | 1.10                     | 5 | 1.8     | 10                          | 11                        | 5 | 1.5     | 10                          |
| <b>Au</b>               | 0.108                      | 5 | 4       | 8.0                         | 1.09                     | 5 | 2.9     | 9.0                         | 11                        | 5 | 1.7     | 7.0                         |

58 <sup>a</sup>: the relative differences between measured contents and theoretical values (based on gravimetric dilutions of stock solutions); n: number of analysis.

59

60

61 Supplementary Table 11† PGE content (ng g<sup>-1</sup>) for synthetic chalcopyrite and bornite determined using 7700x LA-ICP-MS analysis.

| Sample | Item                        | Rh   | Rh <sup>a</sup> | Rh <sup>b</sup> | <sup>105</sup> Pd | <sup>105</sup> Pd <sup>a</sup> | <sup>105</sup> Pd <sup>b</sup> | <sup>106</sup> Pd | <sup>108</sup> Pd |
|--------|-----------------------------|------|-----------------|-----------------|-------------------|--------------------------------|--------------------------------|-------------------|-------------------|
| OSP6   | Mean                        | 94   | 28              | < 50            | 306               | 144                            | 113                            | 112               | 117               |
|        | SD <sup>c</sup>             | 14   | 0.7             |                 | 23                | 26                             | 12                             | 11                | 12                |
|        | RSD (%)                     | 15   | 2.6             |                 | 8                 | 18                             | 11                             | 10                | 10                |
|        | n                           | 12   | 2               | 12              | 12                | 11                             | 10                             | 12                | 12                |
|        | Rel. Diff. (%) <sup>d</sup> | 5913 | 1679            |                 | 244               | 62                             | 27                             | 27                | 34                |
| OSP7   | Mean                        | 161  | 42              | 49              | 481               | 214                            | 201                            | 204               | 184               |
|        | SD <sup>c</sup>             | 17   | 11              |                 | 41                | 40                             | 33                             | 32                | 37                |
|        | RSD (%)                     | 11   | 25              |                 | 9                 | 19                             | 17                             | 16                | 20                |
|        | n                           | 8    | 4               | 1               | 8                 | 7                              | 7                              | 8                 | 8                 |
|        | Rel. Diff. (%) <sup>d</sup> | 6655 | 1663            | 1977            | 150               | 11                             | 5                              | 6                 | -5                |
| OSP9   | Mean                        | 243  | 76              | 69              | 739               | 255                            | 332                            | 333               | 323               |
|        | SD <sup>c</sup>             | 56   | 20              | 21              | 139               | 18                             | 100                            | 100               | 83                |
|        | RSD (%)                     | 23   | 26              | 31              | 19                | 7                              | 30                             | 30                | 26                |
|        | n                           | 12   | 5               | 5               | 12                | 5                              | 12                             | 12                | 12                |
|        | Rel. Diff. (%) <sup>d</sup> | 5731 | 1737            | 1568            | 187               | -0.9                           | 29                             | 30                | 26                |

62 <sup>a</sup>: CuAr<sup>+</sup> interference correction on <sup>103</sup>Rh<sup>+</sup> and <sup>105</sup>Pd<sup>+</sup> is based on the linear correlation between Cu<sup>+</sup> and CuAr<sup>+</sup>; <sup>b</sup>: CuAr<sup>+</sup> interference correction on <sup>103</sup>Rh<sup>+</sup> and <sup>105</sup>Pd<sup>+</sup>  
63 is based on the Paul Sylvester (2002),<sup>53</sup> and Cd interference correction but no ZnAr correction was applied; <sup>c</sup>: standard deviation; <sup>d</sup>: the relative differences between  
64 measured contents and theoretical values (based on gravimetric dilutions of stock solutions); n: number of analysis.

65
